# Supplementary material for: A Quadruplex Real-Time PCR Assay for the Rapid Detection and Differentiation of the Most Relevant Members of the B. pseudomallei Complex: B. mallei, B. pseudomallei, and B. thailandensis
Source: PubMed Central journal article supplement (PMC5063335; doi:10.1371/journal.pone.0164006), 2016-10-13

A

Mismatch sequence:

5'- AACACTGACAAGTGGCCCTATGGA -3'  
 3'- TTGTGACTGTTCCCGGGGATACCT -5'

Exact match sequence:

5'- AACACTGACAAGTGGCCCTATGGA -3'  
 3'- TTGTGACTGTTCCACCGGGGATACCT -5'

|                    | $T_m$<br>[°C] | Gibbs Energy ( $\Delta G_{37}$ )<br>[kcal/mol] | Enthalpy ( $\Delta H$ )<br>[kcal/mol] | Entropy ( $\Delta S$ )<br>[cal/(K·mol)] |
|--------------------|---------------|------------------------------------------------|---------------------------------------|-----------------------------------------|
| <b>Mismatch</b>    | 67.10         | -24.48                                         | -174.90                               | -485.00                                 |
| <b>Exact match</b> | 68.84         | -26.07                                         | -183.30                               | -506.95                                 |
| <b>Difference</b>  | 1.73          | -1.59                                          | -8.40                                 | -21.96                                  |

Duplex Length: 24

Oligo Conc: 0.45  $\mu$ M      Na<sup>+</sup>, K<sup>+</sup> Conc: 50.00 mM      dNTPs Conc: 0.20 mM  
 Target Conc: 0.00  $\mu$ M      Mg<sup>2+</sup> Conc: 1.50 mM

Hybridization profile

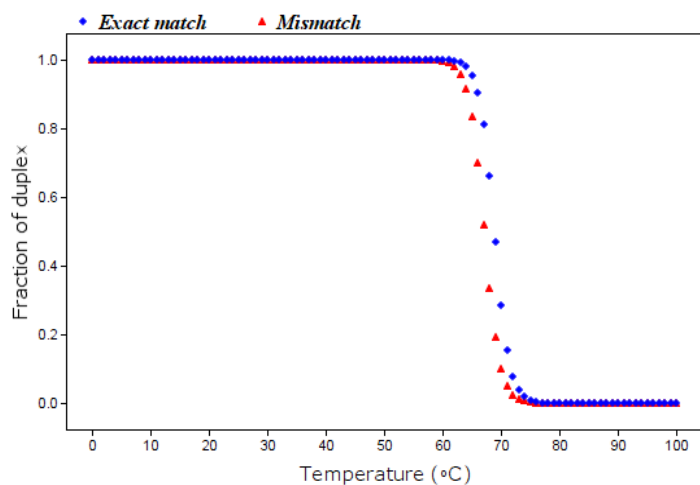

B

Mismatch sequence:

5'- AACACTGACAAGTGGCCCTATGGA -3'  
 3'- TTGTGACTGTTCCACCGGGGATAGCT -5'

Exact match sequence:

5'- AACACTGACAAGTGGCCCTATGGA -3'  
 3'- TTGTGACTGTTCCACCGGGGATACCT -5'

|                    | $T_m$<br>[°C] | Gibbs Energy ( $\Delta G_{37}$ )<br>[kcal/mol] | Enthalpy ( $\Delta H$ )<br>[kcal/mol] | Entropy ( $\Delta S$ )<br>[cal/(K·mol)] |
|--------------------|---------------|------------------------------------------------|---------------------------------------|-----------------------------------------|
| <b>Mismatch</b>    | 64.33         | -22.78                                         | -170.10                               | -475.01                                 |
| <b>Exact match</b> | 68.84         | -26.07                                         | -183.30                               | -506.95                                 |
| <b>Difference</b>  | 4.51          | -3.29                                          | -13.20                                | -31.95                                  |

Duplex Length: 24

Oligo Conc: 0.45  $\mu$ M      Na<sup>+</sup>, K<sup>+</sup> Conc: 50.00 mM      dNTPs Conc: 0.20 mM  
 Target Conc: 0.00  $\mu$ M      Mg<sup>2+</sup> Conc: 1.50 mM

Hybridization profile

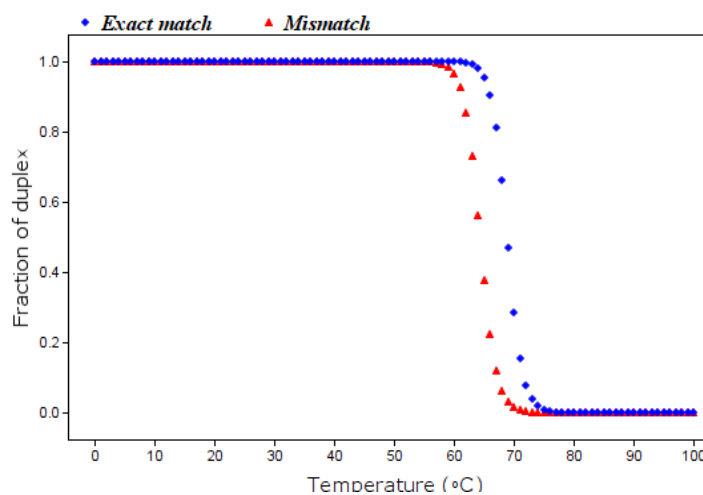

C

Mismatch sequence:

5'- TCCGATCGGTTTTCGAATAACGGGT -3'  
 3'- AGGCAGCCAAAGCTTATTGCCCA -5'

Exact match sequence:

5'- TCCGATCGGTTTTCGAATAACGGGT -3'  
 3'- AGGCTAGCCAAAGCTTATTGCCCA -5'

|                    | $T_m$<br>[°C] | Gibbs Energy ( $\Delta G_{37}$ )<br>[kcal/mol] | Enthalpy ( $\Delta H$ )<br>[kcal/mol] | Entropy ( $\Delta S$ )<br>[cal/(K·mol)] |
|--------------------|---------------|------------------------------------------------|---------------------------------------|-----------------------------------------|
| <b>Mismatch</b>    | 67.26         | -23.52                                         | -163.30                               | -450.69                                 |
| <b>Exact match</b> | 68.77         | -26.58                                         | -189.20                               | -524.32                                 |
| <b>Difference</b>  | 1.51          | -3.06                                          | -25.90                                | -73.63                                  |

Duplex Length: 24

Oligo Conc: 0.45  $\mu$ M      Na<sup>+</sup>, K<sup>+</sup> Conc: 50.00 mM      dNTPs Conc: 0.20 mM  
 Target Conc: 0.00  $\mu$ M      Mg<sup>2+</sup> Conc: 1.50 mM

Hybridization profile

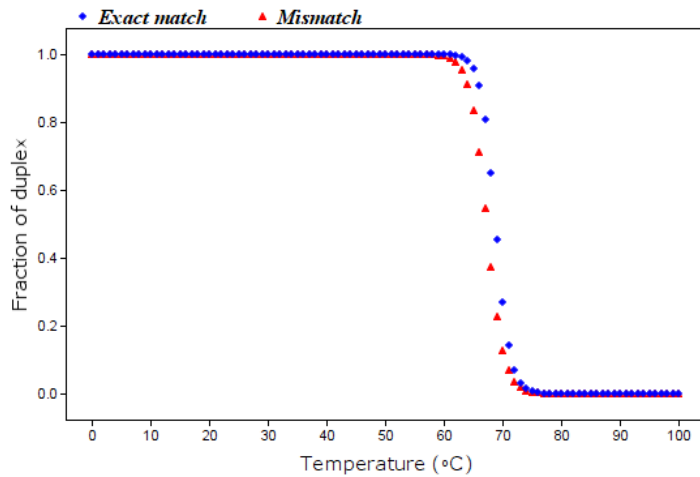

D

Mismatch sequence:

5'- ACGATCTCCGAGAACGCACTGAACA -3'  
 3'- TGTAGAGGCTCTTGCGTGACTTGT -5'

Exact match sequence:

5'- ACGATCTCCGAGAACGCACTGAACA -3'  
 3'- TGCTAGAGGCTCTTGCGTGACTTGT -5'

|                    | $T_m$<br>[°C] | Gibbs Energy ( $\Delta G_{37}$ )<br>[kcal/mol] | Enthalpy ( $\Delta H$ )<br>[kcal/mol] | Entropy ( $\Delta S$ )<br>[cal/(K·mol)] |
|--------------------|---------------|------------------------------------------------|---------------------------------------|-----------------------------------------|
| <b>Mismatch</b>    | 66.79         | -25.40                                         | -186.30                               | -518.77                                 |
| <b>Exact match</b> | 70.40         | -28.49                                         | -199.70                               | -552.02                                 |
| <b>Difference</b>  | 3.61          | -3.09                                          | -13.40                                | -33.25                                  |

Duplex Length: 25

Oligo Conc: 0.40  $\mu$ M      Na<sup>+</sup>, K<sup>+</sup> Conc: 50.00 mM      dNTPs Conc: 0.20 mM  
 Target Conc: 0.00  $\mu$ M      Mg<sup>2+</sup> Conc: 1.50 mM

Hybridization profile

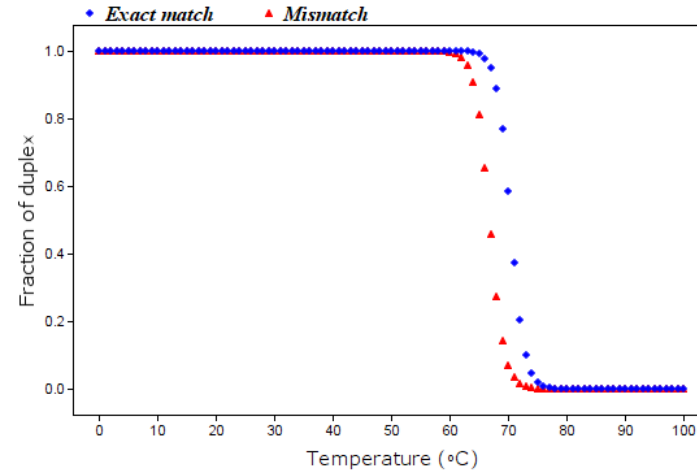

Supplement: pone.0164006.s002.pdf [file pone.0164006.s002.pdf]
