# Supplementary material for: A Quadruplex Real-Time PCR Assay for the Rapid Detection and Differentiation of the Most Relevant Members of the B. pseudomallei Complex: B. mallei, B. pseudomallei, and B. thailandensis
Source: PubMed Central journal article supplement (PMC5063335; doi:10.1371/journal.pone.0164006), 2016-10-13

A

Mismatch sequence:

5'- GGCTCGAACAACCTCGCGCAGG-3'  
 3'- CCGAGTTTGTGGAGCGCGTCC-5'

Exact match sequence:

5'- GGCTCGAACAACCTCGCGCAGG-3'  
 3'- CCGAGCTTGTGGAGCGCGTCC-5'

|                    | $T_m$<br>[°C] | Gibbs Energy ( $\Delta G_{37}$ )<br>[kcal/mol] | Enthalpy ( $\Delta H$ )<br>[kcal/mol] | Entropy ( $\Delta S$ )<br>[cal/(K·mol)] |
|--------------------|---------------|------------------------------------------------|---------------------------------------|-----------------------------------------|
| <b>Mismatch</b>    | 69.89         | -25.30                                         | -169.20                               | -463.97                                 |
| <b>Exact match</b> | 73.75         | -28.42                                         | -182.60                               | -497.11                                 |
| <b>Difference</b>  | 3.86          | -3.12                                          | -13.40                                | -33.14                                  |

Duplex Length: 22

Oligo Conc: 0.40  $\mu$ M      Na<sup>+</sup>, K<sup>+</sup> Conc: 50.00 mM      dNTPs Conc: 0.20 mM  
 Target Conc: 0.00  $\mu$ M      Mg<sup>2+</sup> Conc: 1.50 mM

Hybridization profile

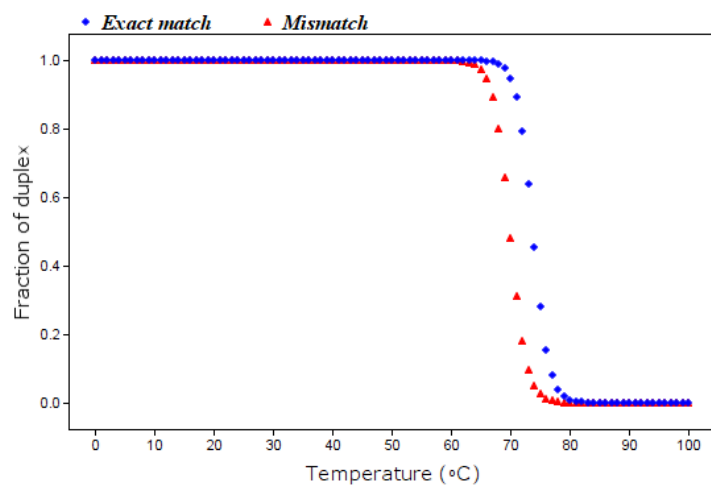

B

Mismatch sequence:

5'- GGCTCGAACAACCTCGCGCAAG-3'  
 3'- CCGAGTTTGTGGAGCGCGTTC-5'

Exact match sequence:

5'- GGCTCGAACAACCTCGCGCAAG-3'  
 3'- CCGAGCTTGTGGAGCGCGTTC-5'

|                    | $T_m$<br>[°C] | Gibbs Energy ( $\Delta G_{37}$ )<br>[kcal/mol] | Enthalpy ( $\Delta H$ )<br>[kcal/mol] | Entropy ( $\Delta S$ )<br>[cal/(K·mol)] |
|--------------------|---------------|------------------------------------------------|---------------------------------------|-----------------------------------------|
| <b>Mismatch</b>    | 67.83         | -24.36                                         | -169.10                               | -466.67                                 |
| <b>Exact match</b> | 71.77         | -27.48                                         | -182.50                               | -499.84                                 |
| <b>Difference</b>  | 3.95          | -3.11                                          | -13.40                                | -33.17                                  |

Duplex Length: 22

Oligo Conc: 0.40  $\mu$ M      Na<sup>+</sup>, K<sup>+</sup> Conc: 50.00 mM      dNTPs Conc: 0.20 mM  
 Target Conc: 0.00  $\mu$ M      Mg<sup>2+</sup> Conc: 1.50 mM

Hybridization profile

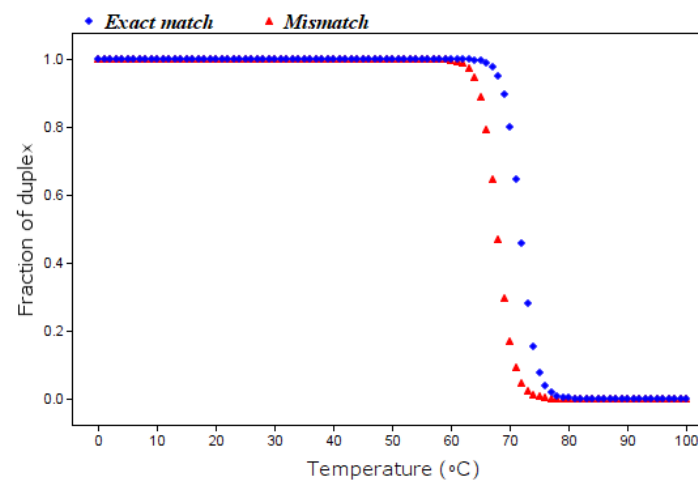

C

Mismatch sequence:

5'- GGCTCGAACAACCTCGCGCAGG -3'  
 3'- CCGAGCTTGTGGACCGCGTCC -5'

Exact match sequence:

5'- GGCTCGAACAACCTCGCGCAGG -3'  
 3'- CCGAGCTTGTGGAGCGCGTCC -5'

|                    | $T_m$<br>[°C] | Gibbs Energy ( $\Delta G_{37}$ )<br>[kcal/mol] | Enthalpy ( $\Delta H$ )<br>[kcal/mol] | Entropy ( $\Delta S$ )<br>[cal/(K·mol)] |
|--------------------|---------------|------------------------------------------------|---------------------------------------|-----------------------------------------|
| <b>Mismatch</b>    | 68.38         | -23.71                                         | -159.20                               | -436.87                                 |
| <b>Exact match</b> | 73.75         | -28.42                                         | -182.60                               | -497.11                                 |
| <b>Difference</b>  | 5.37          | -4.72                                          | -23.40                                | -60.24                                  |

Duplex Length: 22

Oligo Conc: 0.40  $\mu$ M      Na<sup>+</sup>, K<sup>+</sup> Conc: 50.00 mM      dNTPs Conc: 0.20 mM  
 Target Conc: 0.00  $\mu$ M      Mg<sup>2+</sup> Conc: 1.50 mM

Hybridization profile

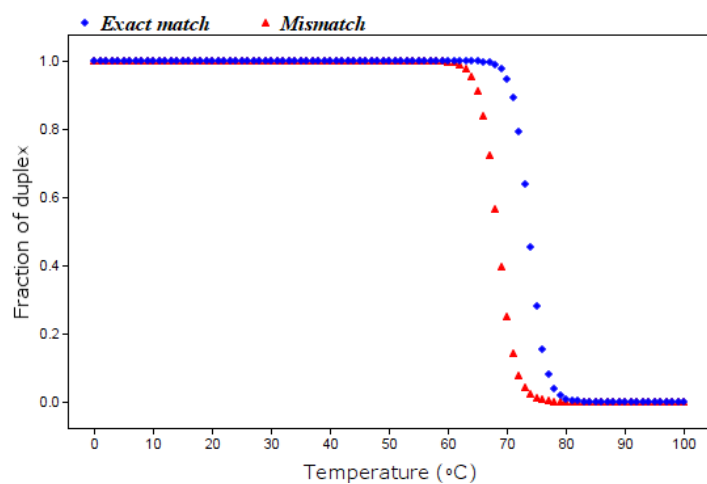

D

Mismatch sequence:

5'- GGCTCGAACAACCTCGCGCAAG -3'  
 3'- CCGAGCTTGTGGACCGCGTTC -5'

Exact match sequence:

5'- GGCTCGAACAACCTCGCGCAAG -3'  
 3'- CCGAGCTTGTGGAGCGCGTTC -5'

|                    | $T_m$<br>[°C] | Gibbs Energy ( $\Delta G_{37}$ )<br>[kcal/mol] | Enthalpy ( $\Delta H$ )<br>[kcal/mol] | Entropy ( $\Delta S$ )<br>[cal/(K·mol)] |
|--------------------|---------------|------------------------------------------------|---------------------------------------|-----------------------------------------|
| <b>Mismatch</b>    | 66.22         | -22.78                                         | -159.10                               | -439.54                                 |
| <b>Exact match</b> | 71.77         | -27.48                                         | -182.50                               | -499.84                                 |
| <b>Difference</b>  | 5.55          | -4.70                                          | -23.40                                | -60.30                                  |

Duplex Length: 22

Oligo Conc: 0.40  $\mu$ M      Na<sup>+</sup>, K<sup>+</sup> Conc: 50.00 mM      dNTPs Conc: 0.20 mM  
 Target Conc: 0.00  $\mu$ M      Mg<sup>2+</sup> Conc: 1.50 mM

Hybridization profile

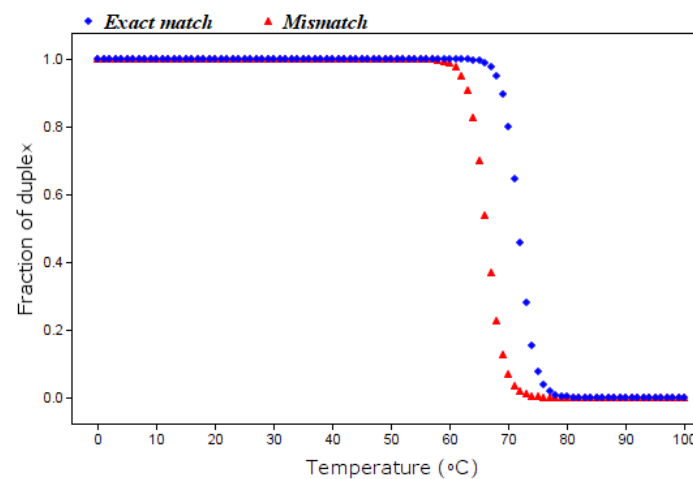

E

Mismatch sequence:

5'-ACGGTCAACAACCTGCAGGCCAA-3'  
 3'-TGCCAC<sup>T</sup>TTGTTGGACGTCCGTT-5'

Exact match sequence:

5'-ACGGTCAACAACCTGCAGGCCAA-3'  
 3'-TGCCAGTTGTTGGACGTCCGTT-5'

|             | $T_m$<br>[°C] | Gibbs Energy ( $\Delta G_{37}$ )<br>[kcal/mol] | Enthalpy ( $\Delta H$ )<br>[kcal/mol] | Entropy ( $\Delta S$ )<br>[cal/(K·mol)] |
|-------------|---------------|------------------------------------------------|---------------------------------------|-----------------------------------------|
| Mismatch    | 67.09         | -21.84                                         | -144.30                               | -394.85                                 |
| Exact match | 70.47         | -25.95                                         | -173.20                               | -474.79                                 |
| Difference  | 3.38          | -4.11                                          | -28.90                                | -79.93                                  |

Duplex Length: 22

Oligo Conc: 0.40  $\mu$ M      Na<sup>+</sup>, K<sup>+</sup> Conc: 50.00 mM      dNTPs Conc: 0.20 mM  
 Target Conc: 0.00  $\mu$ M      Mg<sup>2+</sup> Conc: 1.50 mM

Hybridization profile

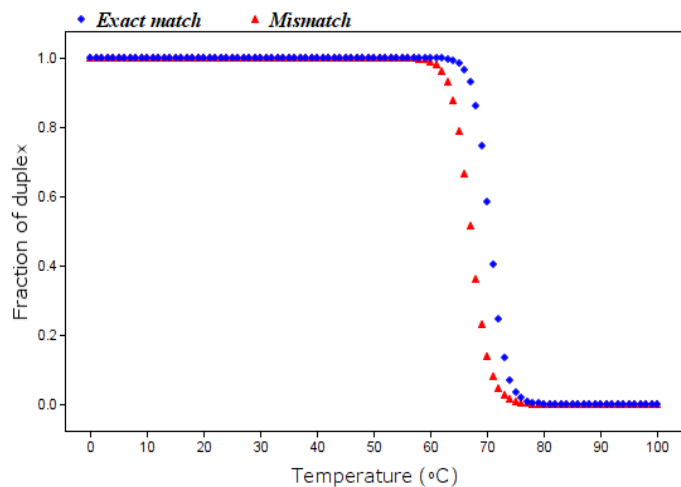

F

Mismatch sequence:

5'-ACGGTCAACAATCTGCAGGCCAA-3'  
 3'-TGCCAC<sup>T</sup>TTGTTAGACGTCCGTT-5'

Exact match sequence:

5'-ACGGTCAACAATCTGCAGGCCAA-3'  
 3'-TGCCAGTTGTTAGACGTCCGTT-5'

|             | $T_m$<br>[°C] | Gibbs Energy ( $\Delta G_{37}$ )<br>[kcal/mol] | Enthalpy ( $\Delta H$ )<br>[kcal/mol] | Entropy ( $\Delta S$ )<br>[cal/(K·mol)] |
|-------------|---------------|------------------------------------------------|---------------------------------------|-----------------------------------------|
| Mismatch    | 64.28         | -20.66                                         | -143.30                               | -395.42                                 |
| Exact match | 68.05         | -24.75                                         | -172.20                               | -475.42                                 |
| Difference  | 3.77          | -4.09                                          | -28.90                                | -80.00                                  |

Duplex Length: 22

Oligo Conc: 0.40  $\mu$ M      Na<sup>+</sup>, K<sup>+</sup> Conc: 50.00 mM      dNTPs Conc: 0.20 mM  
 Target Conc: 0.00  $\mu$ M      Mg<sup>2+</sup> Conc: 1.50 mM

Hybridization profile

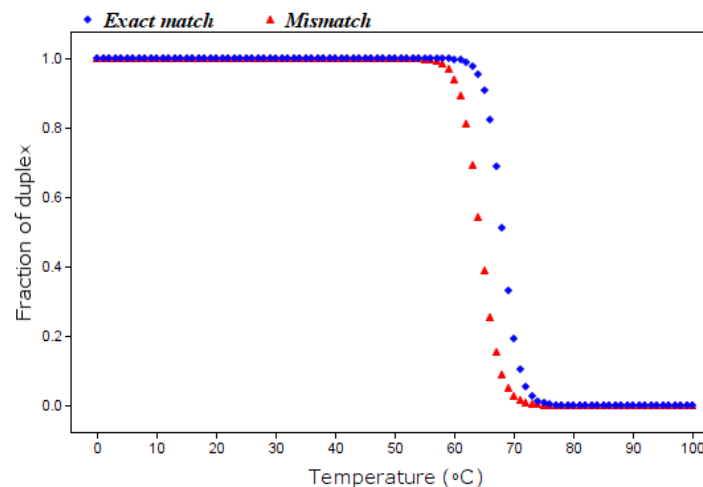

Supplement: pone.0164006.s003.pdf [file pone.0164006.s003.pdf]
