# Supplementary material for: A Quadruplex Real-Time PCR Assay for the Rapid Detection and Differentiation of the Most Relevant Members of the B. pseudomallei Complex: B. mallei, B. pseudomallei, and B. thailandensis
Source: PubMed Central journal article supplement (PMC5063335; doi:10.1371/journal.pone.0164006), 2016-10-13
Supplement: pone.0164006.s001.pdf [file pone.0164006.s001.pdf]

|                              |            |              |               |            |               |     |
|------------------------------|------------|--------------|---------------|------------|---------------|-----|
|                              |            | 20<br>       |               | 40<br>     |               |     |
| B. mallei (AF098793.1)       | ACGGTCAACA | ATCTGCAGGC   | AACGCTCGGC    | GCGGCGCAAA | ACCGCTTCAC    | 50  |
| B.pseudomallei (BX571965.1)  | ACGGTCAACA | ATCTGCAGGC   | AACGCTCGGC    | GCGGCGCAAA | ACCGCTTCAC    | 50  |
| B.thailandensis (AF081500.1) | ACGGTCAACA | ACCTGCAGGC   | AACGCTCGGC    | GCGGCGCAGA | ACCGCTTCAC    | 50  |
| B.vandii ATCC 51545          | ACGATCAACA | ACCTGCAGGC   | AACGCTCGGT    | GCAACCAGAG | ACCGACTGCA    | 50  |
| Forward Primer               | ACGGTCAACA | ATCTGCAGGC   | AA - - - - -  | - - - - -  | - - - - -     | 22  |
| Probe                        | - - - - -  | - - - - -    | - - - - -     | - - - - -  | - - - - -     | -   |
| Reverse Primer               | - - - - -  | - - - - -    | - - - - -     | - - - - -  | - - - - -     | -   |
|                              | 60<br>     |              | 80<br>        |            | 100<br>       |     |
| B. mallei (AF098793.1)       | CGCGATCGCG | ACGACGCGAGC  | AAGCCGGCTC    | GAACAACCTC | GCGCAGGCGC    | 100 |
| B.pseudomallei (BX571965.1)  | CGCGATCGCG | ACGACGCGAGC  | AAGCCGGCTC    | GAACAACCTC | GCGCAGGCGC    | 100 |
| B.thailandensis (AF081500.1) | CGCGATCGCG | ACCACGCGAGC  | AAGCCGGCTC    | GAACAACCTC | GCGCAAGCGC    | 100 |
| B.vandii ATCC 51545          | GGCCATCGCG | CAAAACGCGAGC | AAGCCAAACGC   | GACGAACCTG | TCGTGGGCTC    | 100 |
| Forward Primer               | - - - - -  | - - - - -    | - - - - -     | - - - - -  | - - - - -     | 22  |
| Probe                        | - - - - -  | - - - - -    | - - - - GGCTC | GAACAACCTC | GCGCARG - - - | 22  |
| Reverse Primer               | - - - - -  | - - - - -    | - - - - -     | - - - - -  | - - - - -     | -   |
|                              |            | 120<br>      |               | 140<br>    |               |     |
| B. mallei (AF098793.1)       | AATCGCAAAT | CCAGAGCGCG   | GACTTTGCTC    | AGGAAACCGC | GAAC          | 144 |
| B.pseudomallei (BX571965.1)  | AATCGCAAAT | CCAGAGCGCG   | GACTTTGCTC    | AGGAAACCGC | GAAC          | 144 |
| B.thailandensis (AF081500.1) | AATCGCAAAT | CCAGAGCGCG   | GACTTCGCTC    | AGGAAACCGC | GAAC          | 144 |
| B.vandii ATCC 51545          | AATCGCAAAT | CCAGAGCGCC   | GACTTCGCGC    | AGGAAACCGC | GAAC          | 144 |
| Forward Primer               | - - - - -  | - - - - -    | - - - - -     | - - - - -  | - - - -       | 22  |
| Probe                        | - - - - -  | - - - - -    | - - - - -     | - - - - -  | - - - -       | 22  |
| Reverse Primer               | - - - - -  | - - - - -    | GACTTTGCTC    | AGGAAACCGC | GAAC          | 24  |
