# Supplementary material for: A Quadruplex Real-Time PCR Assay for the Rapid Detection and Differentiation of the Most Relevant Members of the B. pseudomallei Complex: B. mallei, B. pseudomallei, and B. thailandensis
Source: PubMed Central journal article supplement (PMC5063335; doi:10.1371/journal.pone.0164006), 2016-10-13
Supplement: pone.0164006.s004.pdf [file pone.0164006.s004.pdf]

| Species                 | Isolate   | Source | GC-FAME<br>(RBTR3) | U'Ren <i>et al.</i> ,<br>(2005) qPCR | Thibault <i>et al.</i> ,<br>(2004) qPCR | 16.5 kDa<br>(Bm) | <i>Orf11</i><br>(Bp) | 70 kDa<br>(Bt) | <i>fliC</i><br>(Bp Complex) |
|-------------------------|-----------|--------|--------------------|--------------------------------------|-----------------------------------------|------------------|----------------------|----------------|-----------------------------|
| <i>B. mallei</i>        | Turkey #1 | CDC    | Bm                 | Bm                                   | NT                                      | +                | -                    | -              | +                           |
| <i>B. mallei</i>        | 85-503    | CDC    | Bm                 | Bm                                   | NT                                      | +                | -                    | -              | +                           |
| <i>B. mallei</i>        | 86-567-2  | CDC    | Bm                 | Bm                                   | NT                                      | +                | -                    | -              | +                           |
| <i>B. mallei</i>        | 120       | NCTC   | Bm                 | Bm                                   | NT                                      | +                | -                    | -              | +                           |
| <i>B. mallei</i>        | 3708      | NCTC   | Bm                 | Bm                                   | NT                                      | +                | -                    | -              | +                           |
| <i>B. mallei</i>        | 3709      | NCTC   | Bm                 | Bm                                   | NT                                      | +                | -                    | -              | +                           |
| <i>B. mallei</i>        | 10229     | NCTC   | Bm                 | Bm                                   | NT                                      | +                | -                    | -              | +                           |
| <i>B. mallei</i>        | 10247     | NCTC   | Bm                 | Bm                                   | NT                                      | +                | -                    | -              | +                           |
| <i>B. mallei</i>        | 10248     | NCTC   | Bm                 | Bm                                   | NT                                      | +                | -                    | -              | +                           |
| <i>B. mallei</i>        | 10260     | NCTC   | Bm                 | Bm                                   | NT                                      | +                | -                    | -              | +                           |
| <i>B. mallei</i>        | 10399     | ATCC   | Bm                 | Bm                                   | NT                                      | +                | -                    | -              | +                           |
| <i>B. mallei</i>        | 15310     | ATCC   | Bm                 | Bm                                   | NT                                      | +                | -                    | -              | +                           |
| <i>B. mallei</i>        | 23344     | ATCC   | Bm                 | Bm                                   | NT                                      | +                | -                    | -              | +                           |
| <i>B. thailandensis</i> | E27       | UC     | Bp                 | -                                    | +                                       | -                | -                    | +              | +                           |
| <i>B. thailandensis</i> | E96       | UC     | Bp                 | -                                    | +                                       | -                | -                    | +              | +                           |
| <i>B. thailandensis</i> | E125      | UC     | Bp                 | -                                    | +                                       | -                | -                    | +              | +                           |
| <i>B. thailandensis</i> | E135      | UC     | Bp                 | -                                    | +                                       | -                | -                    | +              | +                           |
| <i>B. thailandensis</i> | E254      | NCTC   | Bp                 | -                                    | +                                       | -                | -                    | +              | +                           |
| <i>B. thailandensis</i> | E255      | UC     | Bp                 | -                                    | +                                       | -                | -                    | +              | +                           |
| <i>B. thailandensis</i> | E263      | UC     | Bp                 | -                                    | +                                       | -                | -                    | +              | +                           |
| <i>B. thailandensis</i> | E264      | UC     | Bp                 | -                                    | +                                       | -                | -                    | +              | +                           |
| <i>B. thailandensis</i> | E275      | UC     | Bp                 | -                                    | +                                       | -                | -                    | +              | +                           |
| <i>B. thailandensis</i> | E286      | UC     | Bp                 | -                                    | +                                       | -                | -                    | +              | +                           |
| <i>B. thailandensis</i> | 82172     | PHE    | Bp                 | -                                    | +                                       | -                | -                    | +              | +                           |
| <i>B. pseudomallei</i>  | 8         | PHE    | Bp                 | Bp                                   | NT                                      | -                | +                    | -              | +                           |
| <i>B. pseudomallei</i>  | 9         | PHE    | Bp                 | Bp                                   | NT                                      | -                | +                    | -              | +                           |

| Species                | Isolate | Source | GC-FAME<br>(RBTR3) | U'Ren <i>et al.</i> ,<br>(2005) qPCR | Thibault <i>et al.</i> ,<br>(2004) qPCR | 16.5 kDa<br>(Bm) | <i>Orf11</i><br>(Bp) | 70 kDa<br>(Bt) | <i>fliC</i><br>(Bp Complex) |
|------------------------|---------|--------|--------------------|--------------------------------------|-----------------------------------------|------------------|----------------------|----------------|-----------------------------|
| <i>B. pseudomallei</i> | 14      | PHE    | Bp                 | Bp                                   | NT                                      | -                | +                    | -              | +                           |
| <i>B. pseudomallei</i> | 16      | PHE    | Bp                 | Bp                                   | NT                                      | -                | +                    | -              | +                           |
| <i>B. pseudomallei</i> | 17      | PHE    | Bp                 | Bp                                   | NT                                      | -                | +                    | -              | +                           |
| <i>B. pseudomallei</i> | 18      | PHE    | Bp                 | Bp                                   | NT                                      | -                | +                    | -              | +                           |
| <i>B. pseudomallei</i> | 19      | PHE    | Bp                 | Bp                                   | NT                                      | -                | +                    | -              | +                           |
| <i>B. pseudomallei</i> | 20      | PHE    | Bp                 | Bp                                   | NT                                      | -                | +                    | -              | +                           |
| <i>B. pseudomallei</i> | 24      | PHE    | Bp                 | Bp                                   | NT                                      | -                | +                    | -              | +                           |
| <i>B. pseudomallei</i> | 25      | PHE    | Bp                 | Bp                                   | NT                                      | -                | +                    | -              | +                           |
| <i>B. pseudomallei</i> | 31      | PHE    | Bp                 | Bp                                   | NT                                      | -                | +                    | -              | +                           |
| <i>B. pseudomallei</i> | 33      | PHE    | Bp                 | Bp                                   | NT                                      | -                | +                    | -              | +                           |
| <i>B. pseudomallei</i> | 35      | PHE    | Bp                 | Bp                                   | NT                                      | -                | +                    | -              | +                           |
| <i>B. pseudomallei</i> | 36      | PHE    | Bp                 | Bp                                   | NT                                      | -                | +                    | -              | +                           |
| <i>B. pseudomallei</i> | 38      | PHE    | Bp                 | Bp                                   | NT                                      | -                | +                    | -              | +                           |
| <i>B. pseudomallei</i> | 39      | PHE    | Bp                 | Bp                                   | NT                                      | -                | +                    | -              | +                           |
| <i>B. pseudomallei</i> | 40      | PHE    | Bp                 | Bp                                   | NT                                      | -                | +                    | -              | +                           |
| <i>B. pseudomallei</i> | 43      | PHE    | Bp                 | Bp                                   | NT                                      | -                | +                    | -              | +                           |
| <i>B. pseudomallei</i> | 44      | PHE    | Bp                 | Bp                                   | NT                                      | -                | +                    | -              | +                           |
| <i>B. pseudomallei</i> | 45      | PHE    | Bp                 | Bp                                   | NT                                      | -                | +                    | -              | +                           |
| <i>B. pseudomallei</i> | 46      | PHE    | Bp                 | Bp                                   | NT                                      | -                | +                    | -              | +                           |
| <i>B. pseudomallei</i> | 47      | PHE    | Bp                 | Bp                                   | NT                                      | -                | +                    | -              | +                           |
| <i>B. pseudomallei</i> | 53      | PHE    | Bp                 | Bp                                   | NT                                      | -                | +                    | -              | +                           |
| <i>B. pseudomallei</i> | 66      | PHE    | Bp                 | Bp                                   | NT                                      | -                | +                    | -              | +                           |
| <i>B. pseudomallei</i> | 67      | PHE    | Bp                 | Bp                                   | NT                                      | -                | +                    | -              | +                           |
| <i>B. pseudomallei</i> | 68      | PHE    | Bp                 | Bp                                   | NT                                      | -                | +                    | -              | +                           |
| <i>B. pseudomallei</i> | 71      | PHE    | Bp                 | Bp                                   | NT                                      | -                | +                    | -              | +                           |
| <i>B. pseudomallei</i> | 72      | PHE    | Bp                 | Bp                                   | NT                                      | -                | +                    | -              | +                           |
| <i>B. pseudomallei</i> | 73      | PHE    | Bp                 | Bp                                   | NT                                      | -                | +                    | -              | +                           |
| <i>B. pseudomallei</i> | 75      | PHE    | Bp                 | Bp                                   | NT                                      | -                | +                    | -              | +                           |
| <i>B. pseudomallei</i> | 79      | PHE    | Bp                 | Bp                                   | NT                                      | -                | +                    | -              | +                           |
| <i>B. pseudomallei</i> | 83      | PHE    | Bp                 | Bp                                   | NT                                      | -                | +                    | -              | +                           |
| <i>B. pseudomallei</i> | 84      | PHE    | Bp                 | Bp                                   | NT                                      | -                | +                    | -              | +                           |

| Species                | Isolate    | Source | GC-FAME<br>(RBTR3) | U'Ren <i>et al.</i> ,<br>(2005) qPCR | Thibault <i>et al.</i> ,<br>(2004) qPCR | 16.5 kDa<br>(Bm) | <i>Orf11</i><br>(Bp) | 70 kDa<br>(Bt) | <i>fliC</i><br>(Bp Complex) |
|------------------------|------------|--------|--------------------|--------------------------------------|-----------------------------------------|------------------|----------------------|----------------|-----------------------------|
| <i>B. pseudomallei</i> | 85         | PHE    | Bp                 | Bp                                   | NT                                      | -                | +                    | -              | +                           |
| <i>B. pseudomallei</i> | 91         | PHE    | Bp                 | Bp                                   | NT                                      | -                | +                    | -              | +                           |
| <i>B. pseudomallei</i> | 92         | PHE    | Bp                 | Bp                                   | NT                                      | -                | +                    | -              | +                           |
| <i>B. pseudomallei</i> | 104        | PHE    | Bp                 | Bp                                   | NT                                      | -                | +                    | -              | +                           |
| <i>B. pseudomallei</i> | 110        | PHE    | Bp                 | Bp                                   | NT                                      | -                | +                    | -              | +                           |
| <i>B. pseudomallei</i> | 111        | PHE    | Bp                 | Bp                                   | NT                                      | -                | +                    | -              | +                           |
| <i>B. pseudomallei</i> | 112        | PHE    | Bp                 | Bp                                   | NT                                      | -                | +                    | -              | +                           |
| <i>B. pseudomallei</i> | 126        | PHE    | Bp                 | Bp                                   | NT                                      | -                | +                    | -              | +                           |
| <i>B. pseudomallei</i> | 135*       | PHE    | Bm                 | -                                    | -                                       | -                | -                    | -              | -                           |
| <i>B. pseudomallei</i> | 208        | PHE    | Bp                 | Bp                                   | NT                                      | -                | +                    | -              | +                           |
| <i>B. pseudomallei</i> | 211        | PHE    | Bp                 | Bp                                   | NT                                      | -                | +                    | -              | +                           |
| <i>B. pseudomallei</i> | 216        | PHE    | Bp                 | Bp                                   | NT                                      | -                | +                    | -              | +                           |
| <i>B. pseudomallei</i> | 392        | PHE    | Bp                 | Bp                                   | NT                                      | -                | +                    | -              | +                           |
| <i>B. pseudomallei</i> | 2889       | PHE    | Bp                 | Bp                                   | NT                                      | -                | +                    | -              | +                           |
| <i>B. pseudomallei</i> | 3477       | PHE    | Bp                 | Bp                                   | NT                                      | -                | +                    | -              | +                           |
| <i>B. pseudomallei</i> | 3584       | PHE    | Bp                 | Bp                                   | NT                                      | -                | +                    | -              | +                           |
| <i>B. pseudomallei</i> | 3783       | PHE    | Bp                 | Bp                                   | NT                                      | -                | +                    | -              | +                           |
| <i>B. pseudomallei</i> | 3811       | PHE    | Bp                 | Bp                                   | NT                                      | -                | +                    | -              | +                           |
| <i>B. pseudomallei</i> | 3871       | PHE    | Bp                 | Bp                                   | NT                                      | -                | +                    | -              | +                           |
| <i>B. pseudomallei</i> | 4045       | PHE    | Bp                 | Bp                                   | NT                                      | -                | +                    | -              | +                           |
| <i>B. pseudomallei</i> | 4075       | PHE    | Bp                 | Bp                                   | NT                                      | -                | +                    | -              | +                           |
| <i>B. pseudomallei</i> | 4151       | PHE    | Bp                 | Bp                                   | NT                                      | -                | +                    | -              | +                           |
| <i>B. pseudomallei</i> | 4152       | PHE    | Bp                 | Bp                                   | NT                                      | -                | +                    | -              | +                           |
| <i>B. pseudomallei</i> | 98/SID2953 | PHE    | Bp                 | Bp                                   | NT                                      | -                | +                    | -              | +                           |
| <i>B. pseudomallei</i> | 98/SID3292 | PHE    | Bp                 | Bp                                   | NT                                      | -                | +                    | -              | +                           |
| <i>B. pseudomallei</i> | 99/SID4349 | PHE    | Bp                 | Bp                                   | NT                                      | -                | +                    | -              | +                           |
| <i>B. pseudomallei</i> | 8016       | NCTC   | Bp                 | Bp                                   | NT                                      | -                | +                    | -              | +                           |
| <i>B. pseudomallei</i> | 10276      | NCTC   | Bp                 | Bp                                   | NT                                      | -                | +                    | -              | +                           |
| <i>B. pseudomallei</i> | 11668      | ATCC   | Bp                 | Bp                                   | NT                                      | -                | +                    | -              | +                           |
| <i>B. pseudomallei</i> | 13178      | NCTC   | Bp                 | Bp                                   | NT                                      | -                | +                    | -              | +                           |
| <i>B. pseudomallei</i> | 15682      | ATCC   | Bp                 | Bp                                   | NT                                      | -                | +                    | -              | +                           |

| Species                | Isolate  | Source | GC-FAME<br>(RBTR3) | U'Ren <i>et al.</i> ,<br>(2005) qPCR | Thibault <i>et al.</i> ,<br>(2004) qPCR | 16.5 kDa<br>(Bm) | <i>Orf11</i><br>(Bp) | 70 kDa<br>(Bt) | <i>fliC</i><br>(Bp Complex) |
|------------------------|----------|--------|--------------------|--------------------------------------|-----------------------------------------|------------------|----------------------|----------------|-----------------------------|
| <i>B. pseudomallei</i> | 23343    | ATCC   | Bp                 | Bp                                   | NT                                      | -                | +                    | -              | +                           |
| <i>B. pseudomallei</i> | G9313    | CDC    | Bp                 | Bp                                   | NT                                      | -                | +                    | -              | +                           |
| <i>B. pseudomallei</i> | G9709    | CDC    | Bp                 | Bp                                   | NT                                      | -                | +                    | -              | +                           |
| <i>B. pseudomallei</i> | H929     | CDC    | Bp                 | Bp                                   | NT                                      | -                | +                    | -              | +                           |
| <i>B. pseudomallei</i> | H1406B   | CDC    | Bp                 | Bp                                   | NT                                      | -                | +                    | -              | +                           |
| <i>B. pseudomallei</i> | H1442    | CDC    | Bp                 | Bp                                   | NT                                      | -                | +                    | -              | +                           |
| <i>B. pseudomallei</i> | H1689    | CDC    | Bp                 | Bp                                   | NT                                      | -                | +                    | -              | +                           |
| <i>B. pseudomallei</i> | K96243   | NCTC   | Bp                 | Bp                                   | NT                                      | -                | +                    | -              | +                           |
| <i>B. pseudomallei</i> | KC872    | CDC    | Bp                 | Bp                                   | NT                                      | -                | +                    | -              | +                           |
| <i>B. pseudomallei</i> | 80800117 | UDH    | Bp                 | Bp                                   | NT                                      | -                | +                    | -              | +                           |
| <i>B. pseudomallei</i> | 81300007 | UDH    | Bp                 | Bp                                   | NT                                      | -                | +                    | -              | +                           |
| <i>B. pseudomallei</i> | MSHR 126 | RDH    | Bp                 | Bp                                   | NT                                      | -                | +                    | -              | +                           |
| <i>B. pseudomallei</i> | MSHR 144 | RDH    | Bp                 | Bp                                   | NT                                      | -                | +                    | -              | +                           |
| <i>B. pseudomallei</i> | MSHR 145 | RDH    | Bp                 | Bp                                   | NT                                      | -                | +                    | -              | +                           |
| <i>B. pseudomallei</i> | MSHR 146 | RDH    | Bp                 | Bp                                   | NT                                      | -                | +                    | -              | +                           |
| <i>B. pseudomallei</i> | MSHR 157 | RDH    | Bp                 | Bp                                   | NT                                      | -                | +                    | -              | +                           |
| <i>B. pseudomallei</i> | MSHR 150 | RDH    | Bp                 | Bp                                   | NT                                      | -                | +                    | -              | +                           |
| <i>B. pseudomallei</i> | MSHR 151 | RDH    | Bp                 | Bp                                   | NT                                      | -                | +                    | -              | +                           |
| <i>B. pseudomallei</i> | MSHR 153 | RDH    | Bp                 | Bp                                   | NT                                      | -                | +                    | -              | +                           |
| <i>B. pseudomallei</i> | MSHR 155 | RDH    | Bp                 | Bp                                   | NT                                      | -                | +                    | -              | +                           |
| <i>B. pseudomallei</i> | MSHR 156 | RDH    | Bp                 | Bp                                   | NT                                      | -                | +                    | -              | +                           |
| <i>B. pseudomallei</i> | MSHR 186 | RDH    | Bp                 | Bp                                   | NT                                      | -                | +                    | -              | +                           |
| <i>B. pseudomallei</i> | MSHR 190 | RDH    | Bp                 | Bp                                   | NT                                      | -                | +                    | -              | +                           |
| <i>B. pseudomallei</i> | MSHR 191 | RDH    | Bp                 | Bp                                   | NT                                      | -                | +                    | -              | +                           |
| <i>B. pseudomallei</i> | MSHR 192 | RDH    | Bp                 | Bp                                   | NT                                      | -                | +                    | -              | +                           |
| <i>B. pseudomallei</i> | MSHR 193 | RDH    | Bp                 | Bp                                   | NT                                      | -                | +                    | -              | +                           |
| <i>B. pseudomallei</i> | MSHR 194 | RDH    | Bp                 | Bp                                   | NT                                      | -                | +                    | -              | +                           |
| <i>B. pseudomallei</i> | MSHR 197 | RDH    | Bp                 | Bp                                   | NT                                      | -                | +                    | -              | +                           |
| <i>B. pseudomallei</i> | MSHR 199 | RDH    | Bp                 | Bp                                   | NT                                      | -                | +                    | -              | +                           |
| <i>B. pseudomallei</i> | MSHR 200 | RDH    | Bp                 | Bp                                   | NT                                      | -                | +                    | -              | +                           |
| <i>B. pseudomallei</i> | MSHR 202 | RDH    | Bp                 | Bp                                   | NT                                      | -                | +                    | -              | +                           |

| Species                | Isolate  | Source | GC-FAME<br>(RBTR3) | U'Ren <i>et al.</i> ,<br>(2005) qPCR | Thibault <i>et al.</i> ,<br>(2004) qPCR | 16.5 kDa<br>(Bm) | <i>Orf11</i><br>(Bp) | 70 kDa<br>(Bt) | <i>fliC</i><br>(Bp Complex) |
|------------------------|----------|--------|--------------------|--------------------------------------|-----------------------------------------|------------------|----------------------|----------------|-----------------------------|
| <i>B. pseudomallei</i> | MSHR 203 | RDH    | Bp                 | Bp                                   | NT                                      | -                | +                    | -              | +                           |
| <i>B. pseudomallei</i> | MSHR 206 | RDH    | Bp                 | Bp                                   | NT                                      | -                | +                    | -              | +                           |
| <i>B. pseudomallei</i> | MSHR 207 | RDH    | Bp                 | Bp                                   | NT                                      | -                | +                    | -              | +                           |
| <i>B. pseudomallei</i> | MSHR 208 | RDH    | Bp                 | Bp                                   | NT                                      | -                | +                    | -              | +                           |
| <i>B. pseudomallei</i> | MSHR 209 | RDH    | Bp                 | Bp                                   | NT                                      | -                | +                    | -              | +                           |
| <i>B. pseudomallei</i> | MSHR 225 | RDH    | Bp                 | Bp                                   | NT                                      | -                | +                    | -              | +                           |
| <i>B. pseudomallei</i> | MSHR 255 | RDH    | Bp                 | Bp                                   | NT                                      | -                | +                    | -              | +                           |
| <i>B. pseudomallei</i> | MSHR 257 | RDH    | Bp                 | Bp                                   | NT                                      | -                | +                    | -              | +                           |
| <i>B. pseudomallei</i> | MSHR 267 | RDH    | Bp                 | Bp                                   | NT                                      | -                | +                    | -              | +                           |
| <i>B. pseudomallei</i> | MSHR 283 | RDH    | Bp                 | Bp                                   | NT                                      | -                | +                    | -              | +                           |
| <i>B. pseudomallei</i> | MSHR 284 | RDH    | Bp                 | Bp                                   | NT                                      | -                | +                    | -              | +                           |
| <i>B. pseudomallei</i> | MSHR 307 | RDH    | Bp                 | Bp                                   | NT                                      | -                | +                    | -              | +                           |
| <i>B. pseudomallei</i> | MSHR 309 | RDH    | Bp                 | Bp                                   | NT                                      | -                | +                    | -              | +                           |
| <i>B. pseudomallei</i> | MSHR 347 | RDH    | Bp                 | Bp                                   | NT                                      | -                | +                    | -              | +                           |
| <i>B. pseudomallei</i> | MSHR 351 | RDH    | Bp                 | Bp                                   | NT                                      | -                | +                    | -              | +                           |
| <i>B. pseudomallei</i> | MSHR 352 | RDH    | Bp                 | Bp                                   | NT                                      | -                | +                    | -              | +                           |
| <i>B. pseudomallei</i> | MSHR 357 | RDH    | Bp                 | Bp                                   | NT                                      | -                | +                    | -              | +                           |
| <i>B. pseudomallei</i> | MSHR 363 | RDH    | Bp                 | Bp                                   | NT                                      | -                | +                    | -              | +                           |
| <i>B. pseudomallei</i> | MSHR 368 | RDH    | Bp                 | Bp                                   | NT                                      | -                | +                    | -              | +                           |
| <i>B. pseudomallei</i> | MSHR 369 | RDH    | Bp                 | Bp                                   | NT                                      | -                | +                    | -              | +                           |
| <i>B. pseudomallei</i> | MSHR 370 | RDH    | Bp                 | Bp                                   | NT                                      | -                | +                    | -              | +                           |
| <i>B. pseudomallei</i> | MSHR 371 | RDH    | Bp                 | Bp                                   | NT                                      | -                | +                    | -              | +                           |
| <i>B. pseudomallei</i> | MSHR 395 | RDH    | Bp                 | Bp                                   | NT                                      | -                | +                    | -              | +                           |
| <i>B. pseudomallei</i> | MSHR 397 | RDH    | Bp                 | Bp                                   | NT                                      | -                | +                    | -              | +                           |
| <i>B. pseudomallei</i> | MSHR 398 | RDH    | Bp                 | Bp                                   | NT                                      | -                | +                    | -              | +                           |
| <i>B. pseudomallei</i> | MSHR 402 | RDH    | Bp                 | Bp                                   | NT                                      | -                | +                    | -              | +                           |
| <i>B. pseudomallei</i> | MSHR 403 | RDH    | Bp                 | Bp                                   | NT                                      | -                | +                    | -              | +                           |
| <i>B. pseudomallei</i> | MSHR 406 | RDH    | Bp                 | Bp                                   | NT                                      | -                | +                    | -              | +                           |
| <i>B. pseudomallei</i> | MSHR 414 | RDH    | Bp                 | Bp                                   | NT                                      | -                | +                    | -              | +                           |
| <i>B. pseudomallei</i> | MSHR 415 | RDH    | Bp                 | Bp                                   | NT                                      | -                | +                    | -              | +                           |
| <i>B. pseudomallei</i> | MSHR 417 | RDH    | Bp                 | Bp                                   | NT                                      | -                | +                    | -              | +                           |

| Species                | Isolate   | Source | GC-FAME<br>(RBTR3) | U'Ren <i>et al.</i> ,<br>(2005) qPCR | Thibault <i>et al.</i> ,<br>(2004) qPCR | 16.5 kDa<br>(Bm) | <i>Orf11</i><br>(Bp) | 70 kDa<br>(Bt) | <i>fliC</i><br>(Bp Complex) |
|------------------------|-----------|--------|--------------------|--------------------------------------|-----------------------------------------|------------------|----------------------|----------------|-----------------------------|
| <i>B. pseudomallei</i> | MSHR 419  | RDH    | Bp                 | Bp                                   | NT                                      | -                | +                    | -              | +                           |
| <i>B. pseudomallei</i> | MSHR 434  | RDH    | Bp                 | Bp                                   | NT                                      | -                | +                    | -              | +                           |
| <i>B. pseudomallei</i> | MSHR 523  | RDH    | Bp                 | Bp                                   | NT                                      | -                | +                    | -              | +                           |
| <i>B. pseudomallei</i> | MSHR 630  | RDH    | Bp                 | Bp                                   | NT                                      | -                | +                    | -              | +                           |
| <i>B. pseudomallei</i> | MSHR 684  | RDH    | Bp                 | Bp                                   | NT                                      | -                | +                    | -              | +                           |
| <i>B. pseudomallei</i> | MSHR 695  | RDH    | Bp                 | Bp                                   | NT                                      | -                | +                    | -              | +                           |
| <i>B. pseudomallei</i> | MSHR 861  | RDH    | Bp                 | Bp                                   | NT                                      | -                | +                    | -              | +                           |
| <i>B. pseudomallei</i> | MSHR 867  | RDH    | Bp                 | Bp                                   | NT                                      | -                | +                    | -              | +                           |
| <i>B. pseudomallei</i> | MSHR 906  | RDH    | Bp                 | Bp                                   | NT                                      | -                | +                    | -              | +                           |
| <i>B. pseudomallei</i> | MSHR 1001 | RDH    | Bp                 | Bp                                   | NT                                      | -                | +                    | -              | +                           |
| <i>B. pseudomallei</i> | MSHR 1062 | RDH    | Bp                 | Bp                                   | NT                                      | -                | +                    | -              | +                           |
| <i>B. pseudomallei</i> | MSHR 1073 | RDH    | Bp                 | Bp                                   | NT                                      | -                | +                    | -              | +                           |
| <i>B. pseudomallei</i> | MSHR 1076 | RDH    | Bp                 | Bp                                   | NT                                      | -                | +                    | -              | +                           |
| <i>B. pseudomallei</i> | MSHR 1036 | RDH    | Bp                 | Bp                                   | NT                                      | -                | +                    | -              | +                           |
| <i>B. pseudomallei</i> | MSHR 1042 | RDH    | Bp                 | Bp                                   | NT                                      | -                | +                    | -              | +                           |
| <i>B. pseudomallei</i> | MSHR 1057 | RDH    | Bp                 | Bp                                   | NT                                      | -                | +                    | -              | +                           |
| <i>B. pseudomallei</i> | MSHR 1080 | RDH    | Bp                 | Bp                                   | NT                                      | -                | +                    | -              | +                           |
| <i>B. pseudomallei</i> | MSHR 1081 | RDH    | Bp                 | Bp                                   | NT                                      | -                | +                    | -              | +                           |
| <i>B. pseudomallei</i> | MSHR 1084 | RDH    | Bp                 | Bp                                   | NT                                      | -                | +                    | -              | +                           |
| <i>B. pseudomallei</i> | MSHR 1088 | RDH    | Bp                 | Bp                                   | NT                                      | -                | +                    | -              | +                           |
| <i>B. pseudomallei</i> | MSHR 1089 | RDH    | Bp                 | Bp                                   | NT                                      | -                | +                    | -              | +                           |
| <i>B. pseudomallei</i> | MSHR 1097 | RDH    | Bp                 | Bp                                   | NT                                      | -                | +                    | -              | +                           |
| <i>B. pseudomallei</i> | MSHR 1122 | RDH    | Bp                 | Bp                                   | NT                                      | -                | +                    | -              | +                           |
| <i>B. pseudomallei</i> | MSHR 1144 | RDH    | Bp                 | Bp                                   | NT                                      | -                | +                    | -              | +                           |
| <i>B. pseudomallei</i> | MSHR 1148 | RDH    | Bp                 | Bp                                   | NT                                      | -                | +                    | -              | +                           |
| <i>B. pseudomallei</i> | MSHR 1174 | RDH    | Bp                 | Bp                                   | NT                                      | -                | +                    | -              | +                           |
| <i>B. pseudomallei</i> | MSHR 1186 | RDH    | Bp                 | Bp                                   | NT                                      | -                | +                    | -              | +                           |
| <i>B. pseudomallei</i> | MSHR 1223 | RDH    | Bp                 | Bp                                   | NT                                      | -                | +                    | -              | +                           |
| <i>B. pseudomallei</i> | MSHR 1281 | RDH    | Bp                 | Bp                                   | NT                                      | -                | +                    | -              | +                           |
| <i>B. pseudomallei</i> | MSHR 1286 | RDH    | Bp                 | Bp                                   | NT                                      | -                | +                    | -              | +                           |
| <i>B. pseudomallei</i> | MSHR 1316 | RDH    | Bp                 | Bp                                   | NT                                      | -                | +                    | -              | +                           |

| Species                | Isolate   | Source | GC-FAME<br>(RBTR3) | U'Ren <i>et al.</i> ,<br>(2005) qPCR | Thibault <i>et al.</i> ,<br>(2004) qPCR | 16.5 kDa<br>(Bm) | <i>Orf11</i><br>(Bp) | 70 kDa<br>(Bt) | <i>fliC</i><br>(Bp Complex) |
|------------------------|-----------|--------|--------------------|--------------------------------------|-----------------------------------------|------------------|----------------------|----------------|-----------------------------|
| <i>B. pseudomallei</i> | MSHR 1317 | RDH    | Bp                 | Bp                                   | NT                                      | -                | +                    | -              | +                           |
| <i>B. pseudomallei</i> | MSHR 1320 | RDH    | Bp                 | Bp                                   | NT                                      | -                | +                    | -              | +                           |
| <i>B. pseudomallei</i> | MSHR 1332 | RDH    | Bp                 | Bp                                   | NT                                      | -                | +                    | -              | +                           |
| <i>B. pseudomallei</i> | MSHR 1335 | RDH    | Bp                 | Bp                                   | NT                                      | -                | +                    | -              | +                           |
| <i>B. pseudomallei</i> | MSHR 1348 | RDH    | Bp                 | Bp                                   | NT                                      | -                | +                    | -              | +                           |
| <i>B. pseudomallei</i> | MSHR 1353 | RDH    | Bp                 | Bp                                   | NT                                      | -                | +                    | -              | +                           |
| <i>B. pseudomallei</i> | MSHR 1367 | RDH    | Bp                 | Bp                                   | NT                                      | -                | +                    | -              | +                           |
| <i>B. pseudomallei</i> | MSHR 1368 | RDH    | Bp                 | Bp                                   | NT                                      | -                | +                    | -              | +                           |
| <i>B. pseudomallei</i> | MSHR 1372 | RDH    | Bp                 | Bp                                   | NT                                      | -                | +                    | -              | +                           |
| <i>B. pseudomallei</i> | MSHR 1373 | RDH    | Bp                 | Bp                                   | NT                                      | -                | +                    | -              | +                           |
| <i>B. pseudomallei</i> | MSHR 1392 | RDH    | Bp                 | Bp                                   | NT                                      | -                | +                    | -              | +                           |
| <i>B. pseudomallei</i> | MSHR 1401 | RDH    | Bp                 | Bp                                   | NT                                      | -                | +                    | -              | +                           |
| <i>B. pseudomallei</i> | MSHR 1417 | RDH    | Bp                 | Bp                                   | NT                                      | -                | +                    | -              | +                           |
| <i>B. pseudomallei</i> | MSHR 1428 | RDH    | Bp                 | Bp                                   | NT                                      | -                | +                    | -              | +                           |
| <i>B. pseudomallei</i> | MSHR 1439 | RDH    | Bp                 | Bp                                   | NT                                      | -                | +                    | -              | +                           |
| <i>B. pseudomallei</i> | MSHR 1456 | RDH    | Bp                 | Bp                                   | NT                                      | -                | +                    | -              | +                           |
| <i>B. pseudomallei</i> | MSHR 1500 | RDH    | Bp                 | Bp                                   | NT                                      | -                | +                    | -              | +                           |
| <i>B. pseudomallei</i> | MSHR 1530 | RDH    | Bp                 | Bp                                   | NT                                      | -                | +                    | -              | +                           |
| <i>B. pseudomallei</i> | MSHR 1555 | RDH    | Bp                 | Bp                                   | NT                                      | -                | +                    | -              | +                           |
| <i>B. pseudomallei</i> | MSHR 1562 | RDH    | Bp                 | Bp                                   | NT                                      | -                | +                    | -              | +                           |
| <i>B. pseudomallei</i> | MSHR 1565 | RDH    | Bp                 | Bp                                   | NT                                      | -                | +                    | -              | +                           |
| <i>B. pseudomallei</i> | MSHR 1566 | RDH    | Bp                 | Bp                                   | NT                                      | -                | +                    | -              | +                           |
| <i>B. pseudomallei</i> | MSHR 1569 | RDH    | Bp                 | Bp                                   | NT                                      | -                | +                    | -              | +                           |
| <i>B. pseudomallei</i> | MSHR 1575 | RDH    | Bp                 | Bp                                   | NT                                      | -                | +                    | -              | +                           |
| <i>B. pseudomallei</i> | MSHR 1609 | RDH    | Bp                 | Bp                                   | NT                                      | -                | +                    | -              | +                           |
| <i>B. pseudomallei</i> | MSHR 1631 | RDH    | Bp                 | Bp                                   | NT                                      | -                | +                    | -              | +                           |
| <i>B. pseudomallei</i> | MSHR 1634 | RDH    | Bp                 | Bp                                   | NT                                      | -                | +                    | -              | +                           |
| <i>B. pseudomallei</i> | MSHR 1635 | RDH    | Bp                 | Bp                                   | NT                                      | -                | +                    | -              | +                           |
| <i>B. pseudomallei</i> | MSHR 1709 | RDH    | Bp                 | Bp                                   | NT                                      | -                | +                    | -              | +                           |
| <i>B. pseudomallei</i> | MSHR 1711 | RDH    | Bp                 | Bp                                   | NT                                      | -                | +                    | -              | +                           |
| <i>B. pseudomallei</i> | MSHR 1713 | RDH    | Bp                 | Bp                                   | NT                                      | -                | +                    | -              | +                           |

| Species                | Isolate   | Source | GC-FAME<br>(RBTR3) | U'Ren <i>et al.</i> ,<br>(2005) qPCR | Thibault <i>et al.</i> ,<br>(2004) qPCR | 16.5 kDa<br>(Bm) | <i>Orf11</i><br>(Bp) | 70 kDa<br>(Bt) | <i>fliC</i><br>(Bp Complex) |
|------------------------|-----------|--------|--------------------|--------------------------------------|-----------------------------------------|------------------|----------------------|----------------|-----------------------------|
| <i>B. pseudomallei</i> | MSHR 1714 | RDH    | Bp                 | Bp                                   | NT                                      | -                | +                    | -              | +                           |
| <i>B. pseudomallei</i> | MSHR 1725 | RDH    | Bp                 | Bp                                   | NT                                      | -                | +                    | -              | +                           |
| <i>B. pseudomallei</i> | MSHR 1749 | RDH    | Bp                 | Bp                                   | NT                                      | -                | +                    | -              | +                           |
| <i>B. pseudomallei</i> | MSHR 1759 | RDH    | Bp                 | Bp                                   | NT                                      | -                | +                    | -              | +                           |
| <i>B. pseudomallei</i> | MSHR 1763 | RDH    | Bp                 | Bp                                   | NT                                      | -                | +                    | -              | +                           |
| <i>B. pseudomallei</i> | MSHR 1764 | RDH    | Bp                 | Bp                                   | NT                                      | -                | +                    | -              | +                           |
| <i>B. pseudomallei</i> | MSHR 1766 | RDH    | Bp                 | Bp                                   | NT                                      | -                | +                    | -              | +                           |
| <i>B. pseudomallei</i> | MSHR 1768 | RDH    | Bp                 | Bp                                   | NT                                      | -                | +                    | -              | +                           |
| <i>B. pseudomallei</i> | MSHR 1775 | RDH    | Bp                 | Bp                                   | NT                                      | -                | +                    | -              | +                           |
| <i>B. pseudomallei</i> | MSHR 1777 | RDH    | Bp                 | Bp                                   | NT                                      | -                | +                    | -              | +                           |
| <i>B. pseudomallei</i> | MSHR 1816 | RDH    | NMF                | -                                    | -                                       | -                | -                    | -              | -                           |
| <i>B. pseudomallei</i> | MSHR 1829 | RDH    | Bp                 | Bp                                   | NT                                      | -                | +                    | -              | +                           |
| <i>B. pseudomallei</i> | MSHR 1840 | RDH    | Bp                 | Bp                                   | NT                                      | -                | +                    | -              | +                           |
| <i>B. pseudomallei</i> | MSHR 1848 | RDH    | Bp                 | Bp                                   | NT                                      | -                | +                    | -              | +                           |
| <i>B. pseudomallei</i> | MSHR 1859 | RDH    | Bp                 | Bp                                   | NT                                      | -                | +                    | -              | +                           |
| <i>B. pseudomallei</i> | MSHR 1865 | RDH    | Bp                 | Bp                                   | NT                                      | -                | +                    | -              | +                           |
| <i>B. pseudomallei</i> | MSHR 1866 | RDH    | Bp                 | Bp                                   | NT                                      | -                | +                    | -              | +                           |
| <i>B. pseudomallei</i> | MSHR 1868 | RDH    | Bp                 | Bp                                   | NT                                      | -                | +                    | -              | +                           |
| <i>B. pseudomallei</i> | MSHR 1884 | RDH    | Bp                 | Bp                                   | NT                                      | -                | +                    | -              | +                           |
| <i>B. pseudomallei</i> | MSHR 1886 | RDH    | Bp                 | Bp                                   | NT                                      | -                | +                    | -              | +                           |
| <i>B. pseudomallei</i> | MSHR 1890 | RDH    | Bp                 | Bp                                   | NT                                      | -                | +                    | -              | +                           |
| <i>B. pseudomallei</i> | MSHR 1891 | RDH    | Bp                 | Bp                                   | NT                                      | -                | +                    | -              | +                           |
| <i>B. pseudomallei</i> | MSHR 1893 | RDH    | Bp                 | Bp                                   | NT                                      | -                | +                    | -              | +                           |
| <i>B. pseudomallei</i> | MSHR 1895 | RDH    | Bp                 | Bp                                   | NT                                      | -                | +                    | -              | +                           |
| <i>B. pseudomallei</i> | MSHR 1896 | RDH    | Bp                 | Bp                                   | NT                                      | -                | +                    | -              | +                           |
| <i>B. pseudomallei</i> | MSHR 1905 | RDH    | Bp                 | Bp                                   | NT                                      | -                | +                    | -              | +                           |
| <i>B. pseudomallei</i> | MSHR 1912 | RDH    | Bm                 | Bp                                   | NT                                      | -                | +                    | -              | +                           |
| <i>B. pseudomallei</i> | MSHR 1917 | RDH    | Bp                 | Bp                                   | NT                                      | -                | +                    | -              | +                           |
| <i>B. pseudomallei</i> | MSHR 1926 | RDH    | Bp                 | Bp                                   | NT                                      | -                | +                    | -              | +                           |
| <i>B. pseudomallei</i> | MSHR 1946 | RDH    | Bp                 | Bp                                   | NT                                      | -                | +                    | -              | +                           |
| <i>B. pseudomallei</i> | MSHR 1953 | RDH    | Bp                 | Bp                                   | NT                                      | -                | +                    | -              | +                           |

| Species                | Isolate   | Source | GC-FAME<br>(RBTR3) | U'Ren <i>et al.</i> ,<br>(2005) qPCR | Thibault <i>et al.</i> ,<br>(2004) qPCR | 16.5 kDa<br>(Bm) | <i>Orf11</i><br>(Bp) | 70 kDa<br>(Bt) | <i>fliC</i><br>(Bp Complex) |
|------------------------|-----------|--------|--------------------|--------------------------------------|-----------------------------------------|------------------|----------------------|----------------|-----------------------------|
| <i>B. pseudomallei</i> | MSHR 1954 | RDH    | Bm                 | Bp                                   | NT                                      | -                | +                    | -              | +                           |
| <i>B. pseudomallei</i> | MSHR 1967 | RDH    | Bp                 | Bp                                   | NT                                      | -                | +                    | -              | +                           |
| <i>B. pseudomallei</i> | MSHR 1986 | RDH    | Bm                 | Bp                                   | NT                                      | -                | +                    | -              | +                           |
| <i>B. pseudomallei</i> | MSHR 2002 | RDH    | Bp                 | Bp                                   | NT                                      | -                | +                    | -              | +                           |
| <i>B. pseudomallei</i> | MSHR 2003 | RDH    | Bp                 | Bp                                   | NT                                      | -                | +                    | -              | +                           |
| <i>B. pseudomallei</i> | MSHR 2012 | RDH    | Bp                 | Bp                                   | NT                                      | -                | +                    | -              | +                           |
| <i>B. pseudomallei</i> | MSHR 2024 | RDH    | Bp                 | Bp                                   | NT                                      | -                | +                    | -              | +                           |
| <i>B. pseudomallei</i> | MSHR 2030 | RDH    | Bp                 | Bp                                   | NT                                      | -                | +                    | -              | +                           |
| <i>B. pseudomallei</i> | MSHR 2037 | RDH    | Bp                 | Bp                                   | NT                                      | -                | +                    | -              | +                           |
| <i>B. pseudomallei</i> | MSHR 2040 | RDH    | Bp                 | Bp                                   | NT                                      | -                | +                    | -              | +                           |
| <i>B. pseudomallei</i> | MSHR 2052 | RDH    | Bp                 | Bp                                   | NT                                      | -                | +                    | -              | +                           |
| <i>B. pseudomallei</i> | MSHR 2053 | RDH    | Bp                 | Bp                                   | NT                                      | -                | +                    | -              | +                           |
| <i>B. pseudomallei</i> | MSHR 2080 | RDH    | Bp                 | Bp                                   | NT                                      | -                | +                    | -              | +                           |
| <i>B. pseudomallei</i> | MSHR 2084 | RDH    | Bp                 | Bp                                   | NT                                      | -                | +                    | -              | +                           |
| <i>B. pseudomallei</i> | MSHR 2085 | RDH    | Bp                 | Bp                                   | NT                                      | -                | +                    | -              | +                           |
| <i>B. pseudomallei</i> | MSHR 2086 | RDH    | Bp                 | Bp                                   | NT                                      | -                | +                    | -              | +                           |
| <i>B. pseudomallei</i> | MSHR 2158 | RDH    | Bp                 | Bp                                   | NT                                      | -                | +                    | -              | +                           |
| <i>B. pseudomallei</i> | MSHR 2168 | RDH    | Bp                 | Bp                                   | NT                                      | -                | +                    | -              | +                           |
| <i>B. pseudomallei</i> | MSHR 2170 | RDH    | Bp                 | Bp                                   | NT                                      | -                | +                    | -              | +                           |
| <i>B. pseudomallei</i> | MSHR 2174 | RDH    | Bp                 | Bp                                   | NT                                      | -                | +                    | -              | +                           |
| <i>B. pseudomallei</i> | MSHR 2201 | RDH    | Bp                 | Bp                                   | NT                                      | -                | +                    | -              | +                           |
| <i>B. pseudomallei</i> | MSHR 2208 | RDH    | Bp                 | Bp                                   | NT                                      | -                | +                    | -              | +                           |
| <i>B. pseudomallei</i> | MSHR 2212 | RDH    | Bp                 | Bp                                   | NT                                      | -                | +                    | -              | +                           |
| <i>B. pseudomallei</i> | MSHR 2213 | RDH    | Bp                 | Bp                                   | NT                                      | -                | +                    | -              | +                           |
| <i>B. pseudomallei</i> | MSHR 2214 | RDH    | Bp                 | Bp                                   | NT                                      | -                | +                    | -              | +                           |
| <i>B. pseudomallei</i> | MSHR 2221 | RDH    | Bp                 | Bp                                   | NT                                      | -                | +                    | -              | +                           |
| <i>B. pseudomallei</i> | MSHR 2226 | RDH    | Bp                 | Bp                                   | NT                                      | -                | +                    | -              | +                           |
| <i>B. pseudomallei</i> | MSHR 2227 | RDH    | Bp                 | Bp                                   | NT                                      | -                | +                    | -              | +                           |
| <i>B. pseudomallei</i> | MSHR 2232 | RDH    | Bp                 | Bp                                   | NT                                      | -                | +                    | -              | +                           |
| <i>B. pseudomallei</i> | MSHR 2235 | RDH    | Bp                 | Bp                                   | NT                                      | -                | +                    | -              | +                           |
| <i>B. pseudomallei</i> | MSHR 2236 | RDH    | Bp                 | Bp                                   | NT                                      | -                | +                    | -              | +                           |

| Species                | Isolate   | Source | GC-FAME<br>(RBTR3) | U'Ren <i>et al.</i> ,<br>(2005) qPCR | Thibault <i>et al.</i> ,<br>(2004) qPCR | 16.5 kDa<br>(Bm) | <i>Orf11</i><br>(Bp) | 70 kDa<br>(Bt) | <i>fliC</i><br>(Bp Complex) |
|------------------------|-----------|--------|--------------------|--------------------------------------|-----------------------------------------|------------------|----------------------|----------------|-----------------------------|
| <i>B. pseudomallei</i> | MSHR 2238 | RDH    | Bp                 | Bp                                   | NT                                      | -                | +                    | -              | +                           |
| <i>B. pseudomallei</i> | MSHR 2243 | RDH    | Bp                 | Bp                                   | NT                                      | -                | +                    | -              | +                           |
| <i>B. pseudomallei</i> | MSHR 2245 | RDH    | Bp                 | Bp                                   | NT                                      | -                | +                    | -              | +                           |
| <i>B. pseudomallei</i> | MSHR 2251 | RDH    | Bp                 | Bp                                   | NT                                      | -                | +                    | -              | +                           |
| <i>B. pseudomallei</i> | MSHR 2255 | RDH    | Bp                 | Bp                                   | NT                                      | -                | +                    | -              | +                           |
| <i>B. pseudomallei</i> | MSHR 2258 | RDH    | Bp                 | Bp                                   | NT                                      | -                | +                    | -              | +                           |
| <i>B. pseudomallei</i> | MSHR 2263 | RDH    | Bp                 | Bp                                   | NT                                      | -                | +                    | -              | +                           |
| <i>B. pseudomallei</i> | MSHR 2269 | RDH    | Bp                 | Bp                                   | NT                                      | -                | +                    | -              | +                           |
| <i>B. pseudomallei</i> | MSHR 2350 | RDH    | Bp                 | Bp                                   | NT                                      | -                | +                    | -              | +                           |
| <i>B. pseudomallei</i> | MSHR 2351 | RDH    | Bp                 | Bp                                   | NT                                      | -                | +                    | -              | +                           |
| <i>B. pseudomallei</i> | MSHR 2366 | RDH    | Bp                 | Bp                                   | NT                                      | -                | +                    | -              | +                           |
| <i>B. pseudomallei</i> | MSHR 2375 | RDH    | Bp                 | Bp                                   | NT                                      | -                | +                    | -              | +                           |
| <i>B. pseudomallei</i> | MSHR 2380 | RDH    | Bp                 | Bp                                   | NT                                      | -                | +                    | -              | +                           |
| <i>B. pseudomallei</i> | MSHR 2381 | RDH    | Bp                 | Bp                                   | NT                                      | -                | +                    | -              | +                           |
| <i>B. pseudomallei</i> | MSHR 2385 | RDH    | Bp                 | Bp                                   | NT                                      | -                | +                    | -              | +                           |
| <i>B. pseudomallei</i> | MSHR 2386 | RDH    | Bp                 | Bp                                   | NT                                      | -                | +                    | -              | +                           |
| <i>B. pseudomallei</i> | MSHR 2388 | RDH    | Bp                 | Bp                                   | NT                                      | -                | +                    | -              | +                           |
| <i>B. pseudomallei</i> | MSHR 2391 | RDH    | Bp                 | Bp                                   | NT                                      | -                | +                    | -              | +                           |
| <i>B. pseudomallei</i> | MSHR 2393 | RDH    | Bp                 | Bp                                   | NT                                      | -                | +                    | -              | +                           |
| <i>B. pseudomallei</i> | MSHR 2394 | RDH    | Bc/Bpy/Ba          | Bp                                   | NT                                      | -                | +                    | -              | +                           |
| <i>B. pseudomallei</i> | MSHR 2395 | RDH    | Bp                 | Bp                                   | NT                                      | -                | +                    | -              | +                           |
| <i>B. pseudomallei</i> | MSHR 2398 | RDH    | Bp                 | Bp                                   | NT                                      | -                | +                    | -              | +                           |
| <i>B. pseudomallei</i> | MSHR 2400 | RDH    | Bp                 | Bp                                   | NT                                      | -                | +                    | -              | +                           |
| <i>B. pseudomallei</i> | MSHR 2403 | RDH    | Bp                 | Bp                                   | NT                                      | -                | +                    | -              | +                           |
| <i>B. pseudomallei</i> | MSHR 2409 | RDH    | Bp                 | Bp                                   | NT                                      | -                | +                    | -              | +                           |
| <i>B. ambifaria</i>    | BAA-244   | ATCC   | NT                 | -                                    | -                                       | -                | -                    | -              | -                           |
| <i>B. andropogonis</i> | 23061     | ATCC   | NT                 | -                                    | -                                       | -                | -                    | -              | -                           |
| <i>B. cepacia</i>      | 10856     | ATCC   | NT                 | -                                    | -                                       | -                | -                    | -              | -                           |
| <i>B. cepacia</i>      | 25416     | ATCC   | NT                 | -                                    | -                                       | -                | -                    | -              | -                           |
| <i>B. gladioli</i>     | 10248     | ATCC   | NT                 | -                                    | -                                       | -                | -                    | -              | -                           |

| Species                 | Isolate | Source | GC-FAME<br>(RBTR3) | U'Ren <i>et al.</i> ,<br>(2005) qPCR | Thibault <i>et al.</i> ,<br>(2004) qPCR | 16.5 kDa<br>(Bm) | <i>Orf11</i><br>(Bp) | 70 kDa<br>(Bt) | <i>fliC</i><br>(Bp Complex) |
|-------------------------|---------|--------|--------------------|--------------------------------------|-----------------------------------------|------------------|----------------------|----------------|-----------------------------|
| <i>B. glathei</i>       | 29196   | ATCC   | NT                 | -                                    | -                                       | -                | -                    | -              | -                           |
| <i>B. graminis</i>      | 700544  | ATCC   | NT                 | -                                    | -                                       | -                | -                    | -              | -                           |
| <i>B. multivorans</i>   | BAA-247 | ATCC   | NT                 | -                                    | -                                       | -                | -                    | -              | -                           |
| <i>B. pyrrocina</i>     | 15958   | ATCC   | NT                 | -                                    | -                                       | -                | -                    | -              | -                           |
| <i>B. sordidicola</i>   | 49583   | CCUG   | NT                 | -                                    | -                                       | -                | -                    | -              | -                           |
| <i>B. vandii</i>        | 51545   | ATCC   | NT                 | -                                    | -                                       | -                | -                    | -              | -                           |
| <i>B. vietnamiensis</i> | BAA-248 | ATCC   | NT                 | -                                    | -                                       | -                | -                    | -              | -                           |
| <i>P. aeruginosa</i>    | 15442   | ATCC   | NT                 | -                                    | -                                       | -                | -                    | -              | -                           |
| <i>R. solancearum</i>   | 11696   | ATCC   | NT                 | -                                    | -                                       | -                | -                    | -              | -                           |
| <i>S. maltophilia</i>   | 13637   | ATCC   | NT                 | -                                    | -                                       | -                | -                    | -              | -                           |

Ba, *B. ambifaria*; Bc, *B. cenocepacia*; Bm, *B. mallei*; Bp, *B. pseudomallei*; Bpy, *B. pyrrocina*; NMF, No Matches Found; NT, Not tested;  
\*, Misclassified bacterial isolates

ATCC, American Type Culture Collection; CCUG, Culture Collection, University of Göteborg; CDC, Centers for Disease Control and Prevention;  
RDH, Royal Darwin Hospital; NCTC, National Collection of Type Cultures; PHE, Public Health England; UC, University of Calgary; UDH, Utah  
Department of Health
