# Supplementary material for: A Quadruplex Real-Time PCR Assay for the Rapid Detection and Differentiation of the Most Relevant Members of the B. pseudomallei Complex: B. mallei, B. pseudomallei, and B. thailandensis
Source: PubMed Central journal article supplement (PMC5063335; doi:10.1371/journal.pone.0164006), 2016-10-13
Supplement: pone.0164006.s005.pdf [file pone.0164006.s005.pdf]

| <b>Species</b>                | <b>Country of Origin</b>       | <b>Source</b> | <b>No. of Isolates</b> |
|-------------------------------|--------------------------------|---------------|------------------------|
| <b><i>B. mallei</i></b>       | China                          | Animal        | 1                      |
|                               | China                          | Human         | 1                      |
|                               | Hungary                        | Animal        | 1                      |
|                               | Hungary                        | Unknown       | 1                      |
|                               | India                          | Animal        | 2                      |
|                               | India                          | Unknown       | 1                      |
|                               | Turkey                         | Human         | 2                      |
|                               | Turkey                         | Unknown       | 1                      |
|                               | United Kingdom                 | Unknown       | 1                      |
|                               | Unknown                        | Animal        | 1                      |
|                               | Unknown                        | Unknown       | 1                      |
|                               | <b>5 (Total)</b>               |               | <b>13 (Total)</b>      |
|                               | <b><i>B. thailandensis</i></b> | Thailand      | Environmental          |
| France                        |                                | Animal        | 1                      |
| <b>2 (Total)</b>              |                                | 1             | <b>11 (Total)</b>      |
| <b><i>B. pseudomallei</i></b> | Australia                      | Animal        | 54                     |
|                               | Australia                      | Environmental | 32                     |
|                               | Australia                      | Human         | 121*                   |
|                               | Bangladesh                     | Human         | 1                      |
|                               | Ecuador                        | Human         | 1                      |
|                               | Fiji                           | Human         | 1                      |
|                               | France                         | Animal        | 1                      |
|                               | France                         | Environmental | 1                      |
|                               | Holland                        | Human         | 3                      |
|                               | Indonesia                      | Animal        | 3                      |
|                               | Italy                          | Human         | 1                      |
|                               | Kenya                          | Environmental | 1                      |
|                               | Kenya                          | Human         | 1                      |
|                               | Madagascar                     | Environmental | 1                      |
|                               | Malaysia                       | Human         | 5                      |
|                               | Pakistan                       | Human         | 1                      |
|                               | Papua New Guinea               | Human         | 1                      |
|                               | Philippines                    | Animal        | 2                      |
|                               | Singapore                      | Environmental | 1                      |
|                               | Singapore                      | Human         | 4                      |
|                               | Sweden                         | Human         | 1                      |
|                               | Thailand                       | Environmental | 1                      |
|                               | Thailand                       | Human         | 13                     |
|                               | Thailand                       | Environmental | 1*                     |
|                               | United Kingdom                 | Human         | 8                      |
|                               | United Kingdom                 | Unknown       | 1                      |
|                               | United States                  | Human         | 2                      |
|                               | Venezuela                      | Unknown       | 1                      |
|                               | Vietnam                        | Human         | 1                      |
|                               | Unknown                        | Animal        | 1                      |
|                               | Unknown                        | Human         | 1                      |
|                               | Unknown                        | Unknown       | 8                      |
|                               | <b>21 (Total)</b>              |               | <b>275 (Total)</b>     |

\*An isolate from this category is misclassified
