# Supplementary material for: A Quadruplex Real-Time PCR Assay for the Rapid Detection and Differentiation of the Most Relevant Members of the B. pseudomallei Complex: B. mallei, B. pseudomallei, and B. thailandensis
Source: PubMed Central journal article supplement (PMC5063335; doi:10.1371/journal.pone.0164006), 2016-10-13
Supplement: pone.0164006.s006.pdf [file pone.0164006.s006.pdf]

| Species                 | Isolate             | Accession Number | 16.5 kDa (Bm) | <i>Orf11</i> (Bp) | 70 kDa (Bt) | <i>fliC</i> (Bp, Bm, Bt, Bo Complex) |
|-------------------------|---------------------|------------------|---------------|-------------------|-------------|--------------------------------------|
| <i>B. mallei</i>        | 6                   | CP008711         | +             | -                 | -           | +                                    |
| <i>B. mallei</i>        | 11                  | CP009587         | +             | -                 | -           | +                                    |
| <i>B. mallei</i>        | 23344               | CP008704         | +             | -                 | -           | +                                    |
| <i>B. mallei</i>        | 2000031063          | CP008732         | +             | -                 | -           | +                                    |
| <i>B. mallei</i>        | 2002721276          | CP010065         | +             | -                 | -           | +                                    |
| <i>B. mallei</i>        | 2002734299          | CP009337         | +             | -                 | -           | +                                    |
| <i>B. mallei</i>        | 2002734306          | CP009707         | +             | -                 | -           | +                                    |
| <i>B. mallei</i>        | BMQ                 | CP008723         | +             | -                 | -           | +                                    |
| <i>B. mallei</i>        | India86-567-2       | CP009642         | +             | -                 | -           | +                                    |
| <i>B. mallei</i>        | FMH 23344           | CP009148         | +             | -                 | -           | +                                    |
| <i>B. mallei</i>        | KC 1092             | CP009942         | +             | -                 | -           | +                                    |
| <i>B. mallei</i>        | NCTC 10229          | CP000546         | +             | -                 | -           | +                                    |
| <i>B. mallei</i>        | NCTC 10247          | CP007802         | +             | -                 | -           | +                                    |
| <i>B. mallei</i>        | SAVP1               | CP000526         | +             | -                 | -           | +                                    |
| <i>B. thailandensis</i> | 34                  | CP010017         | -             | -                 | +           | ++                                   |
| <i>B. thailandensis</i> | 2002721643          | CP009601         | -             | -                 | +           | +                                    |
| <i>B. thailandensis</i> | 2002721723          | CP004097         | -             | -                 | +           | +                                    |
| <i>B. thailandensis</i> | 2003015869          | CP008914         | -             | -                 | +           | ++                                   |
| <i>B. thailandensis</i> | E254                | CP004381         | -             | -                 | +           | +                                    |
| <i>B. thailandensis</i> | E264                | CP008786         | -             | -                 | +           | +                                    |
| <i>B. thailandensis</i> | E444                | CP004117         | -             | -                 | +           | +                                    |
| <i>B. thailandensis</i> | H0587               | CP004089         | -             | -                 | +           | ++                                   |
| <i>B. thailandensis</i> | MSMB 59             | CP004385         | -             | -                 | +           | +                                    |
| <i>B. thailandensis</i> | USAMRU Malaysia #20 | CP004383         | -             | -                 | +           | +                                    |
| <i>B. pseudomallei</i>  | 9                   | CP008755         | -             | +                 | -           | +                                    |
| <i>B. pseudomallei</i>  | 406e                | CP009298         | -             | +                 | -           | +                                    |
| <i>B. pseudomallei</i>  | 576                 | CP008777         | -             | +                 | -           | +                                    |
| <i>B. pseudomallei</i>  | 982                 | CP012576         | -             | +                 | -           | +                                    |
| <i>B. pseudomallei</i>  | 1026b               | CP004379         | -             | +                 | -           | +                                    |
| <i>B. pseudomallei</i>  | 1106a               | CP008758         | -             | +                 | -           | +                                    |
| <i>B. pseudomallei</i>  | 1710b               | CP000124         | -             | +                 | -           | +                                    |
| <i>B. pseudomallei</i>  | 7894                | CP009535         | -             | +                 | -           | +                                    |
| <i>B. pseudomallei</i>  | 13179               | CP003977         | -             | +                 | -           | +                                    |
| <i>B. pseudomallei</i>  | 350105              | CP012094         | -             | +                 | -           | +                                    |
| <i>B. pseudomallei</i>  | A79A                | CP009165         | -             | +                 | -           | +                                    |
| <i>B. pseudomallei</i>  | B03                 | CP009151         | -             | +                 | -           | +                                    |
| <i>B. pseudomallei</i>  | BDP                 | CP009209         | -             | ++                | -           | +                                    |
| <i>B. pseudomallei</i>  | BGK                 | CP008916         | -             | +                 | -           | +                                    |
| <i>B. pseudomallei</i>  | BGR                 | CP008834         | -             | +                 | -           | +                                    |

| Species                | Isolate       | Accession Number | 16.5 kDa (Bm) | Orf11 (Bp) | 70 kDa (Bt) | <i>fliC</i> (Bp, Bm, Bt, Bo Complex) |
|------------------------|---------------|------------------|---------------|------------|-------------|--------------------------------------|
| <i>B. pseudomallei</i> | Bp1651        | CP012041         | -             | ++         | -           | +                                    |
| <i>B. pseudomallei</i> | BP 3921g      | LK936442         | -             | +          | -           | +                                    |
| <i>B. pseudomallei</i> | BPC006        | CP003781         | -             | +          | -           | +                                    |
| <i>B. pseudomallei</i> | BSR           | CP009128         | -             | +          | -           | +                                    |
| <i>B. pseudomallei</i> | HB PUB10134a  | CP008911         | -             | ++         | -           | +                                    |
| <i>B. pseudomallei</i> | HB PUB10303a  | CP008894         | -             | +          | -           | +                                    |
| <i>B. pseudomallei</i> | K42           | CP009162         | -             | ++         | -           | +                                    |
| <i>B. pseudomallei</i> | K96243        | CP009538         | -             | +          | -           | +                                    |
| <i>B. pseudomallei</i> | Mahidol-1106a | CP008781         | -             | +          | -           | +                                    |
| <i>B. pseudomallei</i> | MSHR 62       | CP009235         | -             | +          | -           | +                                    |
| <i>B. pseudomallei</i> | MSHR 146      | CP004042         | -             | ++         | -           | +                                    |
| <i>B. pseudomallei</i> | MSHR 305      | CP006470         | -             | ++         | -           | +                                    |
| <i>B. pseudomallei</i> | MSHR 346      | CP008764         | -             | ++         | -           | +                                    |
| <i>B. pseudomallei</i> | MSHR 491      | CP009485         | -             | ++         | -           | +                                    |
| <i>B. pseudomallei</i> | MSHR 511      | CP004023         | -             | ++         | -           | +                                    |
| <i>B. pseudomallei</i> | MSHR 520      | CP004368         | -             | ++         | -           | +                                    |
| <i>B. pseudomallei</i> | MSHR 668      | CP009545         | -             | ++         | -           | +                                    |
| <i>B. pseudomallei</i> | MSHR 840      | CP009474         | -             | ++         | -           | +                                    |
| <i>B. pseudomallei</i> | MSHR 1153     | CP009271         | -             | +          | -           | +                                    |
| <i>B. pseudomallei</i> | MSHR 1655     | CP008780         | -             | +          | -           | ++                                   |
| <i>B. pseudomallei</i> | MSHR 2243     | CP009270         | -             | +          | -           | +                                    |
| <i>B. pseudomallei</i> | MSHR 2543     | CP009478         | -             | +          | -           | +                                    |
| <i>B. pseudomallei</i> | MSHR 3965     | CP009153         | -             | +          | -           | +                                    |
| <i>B. pseudomallei</i> | MSHR 5848     | CP008909         | -             | +          | -           | +                                    |
| <i>B. pseudomallei</i> | MSHR 5855     | CP008784         | -             | +          | -           | +                                    |
| <i>B. pseudomallei</i> | MSHR 5858     | CP008892         | -             | +          | -           | +                                    |
| <i>B. pseudomallei</i> | NAU20B-16     | CP004003         | -             | ++         | -           | +                                    |
| <i>B. pseudomallei</i> | NAU35A-3      | CP004377         | -             | +          | -           | +                                    |
| <i>B. pseudomallei</i> | NCTC 13178    | CP004001         | -             | +          | -           | +                                    |
| <i>B. pseudomallei</i> | Pasteur 52237 | CP009899         | -             | +          | -           | +                                    |
| <i>B. pseudomallei</i> | PB08298010    | CP009551         | -             | ++         | -           | +                                    |
| <i>B. pseudomallei</i> | PHLS 112      | CP009585         | -             | ++         | -           | +                                    |
| <i>B. pseudomallei</i> | TSV48         | CP009161         | -             | ++         | -           | +                                    |
| <i>B. pseudomallei</i> | TSV202        | CP009157         | -             | +          | -           | ++                                   |
| <i>B. pseudomallei</i> | vgh07         | CP010973         | -             | +          | -           | +                                    |
| <i>B. pseudomallei</i> | vgh16R        | CP012515         | -             | +          | -           | +                                    |
| <i>B. pseudomallei</i> | vgh16W        | CP012517         | -             | +          | -           | +                                    |
| <i>B. oklahomensis</i> | C6786         | CP009555         | -             | -          | -           | ++                                   |
| <i>B. oklahomensis</i> | EO147         | CP008726         | -             | -          | -           | ++                                   |
| <i>B. cenocepacia</i>  | MC0-3         | CP000959         | -             | -          | -           | -                                    |
| <i>B. cepacia</i>      | GG4           | CP003775         | -             | -          | -           | -                                    |

| Species                  | Isolate    | Accession Number | 16.5 kDa (Bm) | Orf11 (Bp) | 70kDa (Bt) | <i>fliC</i> (Bp, Bm, Bt, Bo Complex) |
|--------------------------|------------|------------------|---------------|------------|------------|--------------------------------------|
| <i>B. dolosa</i>         | AU0158     | CP009794         | -             | -          | -          | -                                    |
| <i>B. humptydooensis</i> | MSMB 43    | CP013382         | -             | -          | -          | -                                    |
| <i>B. humptydooensis</i> | MSMB 121   | CP004096         | -             | -          | -          | -                                    |
| <i>B. multivorans</i>    | ATCC 17616 | AP009386         | -             | -          | -          | -                                    |
| <i>B. ubonensis</i>      | MSMB22     | CP009486         | -             | -          | -          | -                                    |
| <i>B. vietnamiensis</i>  | LMG 10929  | CP009631         | -             | -          | -          | -                                    |

+, indicates the assays will detect the indicated *Burkholderia* strain containing an exact match

++, indicates the assay will detect the indicated *Burkholderia* strain containing a mismatch

| Isolate                   | <i>orf11</i> Forward T-G<br>Mismatch 1<br>FoD: 0.991 | <i>orf11</i> Forward G-G<br>Mismatch 2<br>FoD: 0.926 | <i>orf11</i> Reverse A-C<br>Mismatch<br>FoD: 0.989 | <i>orf11</i> Probe G-T<br>Mismatch<br>FoD: 0.992 |
|---------------------------|------------------------------------------------------|------------------------------------------------------|----------------------------------------------------|--------------------------------------------------|
| <i>Mismatch profile 1</i> |                                                      |                                                      |                                                    |                                                  |
| Bp HB PUB10134a           | x                                                    |                                                      | x                                                  |                                                  |
| Bp PHL 112*               | x                                                    |                                                      | x                                                  |                                                  |
| <i>Mismatch profile 2</i> |                                                      |                                                      |                                                    |                                                  |
| Bp BDP                    |                                                      | x                                                    | x                                                  |                                                  |
| Bp MSHR 305               |                                                      | x                                                    | x                                                  |                                                  |
| Bp MSHR 520               |                                                      | x                                                    | x                                                  |                                                  |
| <i>Mismatch profile 3</i> |                                                      |                                                      |                                                    |                                                  |
| Bp Bp1651                 |                                                      |                                                      | x                                                  |                                                  |
| Bp K42                    |                                                      |                                                      | x                                                  |                                                  |
| Bp MSHR146*               |                                                      |                                                      | x                                                  |                                                  |
| Bp MSHR 346               |                                                      |                                                      | x                                                  |                                                  |
| Bp MSHR 511               |                                                      |                                                      | x                                                  |                                                  |
| Bp PB08298010             |                                                      |                                                      | x                                                  |                                                  |
| Bp NAU20B-16              |                                                      |                                                      | x                                                  |                                                  |
| Bp TSV48                  |                                                      |                                                      | x                                                  |                                                  |
| <i>Mismatch profile 4</i> |                                                      |                                                      |                                                    |                                                  |
| Bp MSHR 391               |                                                      |                                                      | x                                                  | x                                                |
| Bp MSHR 491               |                                                      |                                                      | x                                                  | x                                                |
| Bp MSHR 668               |                                                      |                                                      | x                                                  | x                                                |

FoD, Fraction of duplex; Bp, *B. pseudomallei*; Bt, *B. thailandensis*; \*, indicates sample was previously tested by the *Bcom* assay

| <b>Isolate</b>            | <b><i>fliC</i> Probe G-T<br/>Mismatch 1<br/>FoD: 0.997</b> | <b><i>fliC</i> Probe C-C<br/>Mismatch 2<br/>FoD: 0.985</b> | <b><i>fliC</i> Forward C-C<br/>Mismatch<br/>FoD: 0.940</b> |
|---------------------------|------------------------------------------------------------|------------------------------------------------------------|------------------------------------------------------------|
| <i>Mismatch profile 1</i> |                                                            |                                                            |                                                            |
| Bp TSV202                 | x                                                          |                                                            |                                                            |
| Bp MSHR 1655              | x                                                          |                                                            |                                                            |
| <i>Mismatch profile 2</i> |                                                            |                                                            |                                                            |
| Bt 34                     |                                                            | x                                                          |                                                            |
| Bt 2003015869             |                                                            | x                                                          |                                                            |
| Bt H0587                  |                                                            | x                                                          |                                                            |
| <i>Mismatch profile 3</i> |                                                            |                                                            |                                                            |
| Bo C6786                  |                                                            | x                                                          | x                                                          |
| Bo EO147                  |                                                            | x                                                          | x                                                          |

FoD, Fraction of duplex; Bp, *B. pseudomallei*; Bt, *B. thailandensis*; Bo, *B. oklahomensis*
