# Supplementary material for: A Quadruplex Real-Time PCR Assay for the Rapid Detection and Differentiation of the Most Relevant Members of the B. pseudomallei Complex: B. mallei, B. pseudomallei, and B. thailandensis
Source: PubMed Central journal article supplement (PMC5063335; doi:10.1371/journal.pone.0164006), 2016-10-13
Supplement: pone.0164006.s007.pdf [file pone.0164006.s007.pdf]

| <b>Isolate</b>            | <b><i>orf11</i> Forward T-G<br/>Mismatch 1<br/>FoD: 0.991</b> | <b><i>orf11</i> Forward G-G<br/>Mismatch 2<br/>FoD: 0.926</b> | <b><i>orf11</i> Reverse A-C<br/>Mismatch<br/>FoD: 0.989</b> | <b><i>orf11</i> Probe G-T<br/>Mismatch<br/>FoD: 0.992</b> |
|---------------------------|---------------------------------------------------------------|---------------------------------------------------------------|-------------------------------------------------------------|-----------------------------------------------------------|
| <i>Mismatch profile 1</i> |                                                               |                                                               |                                                             |                                                           |
| Bp HB PUB10134a           | x                                                             |                                                               | x                                                           |                                                           |
| Bp PHL 112*               | x                                                             |                                                               | x                                                           |                                                           |
| <i>Mismatch profile 2</i> |                                                               |                                                               |                                                             |                                                           |
| Bp BDP                    |                                                               | x                                                             | x                                                           |                                                           |
| Bp MSHR 305               |                                                               | x                                                             | x                                                           |                                                           |
| Bp MSHR 520               |                                                               | x                                                             | x                                                           |                                                           |
| <i>Mismatch profile 3</i> |                                                               |                                                               |                                                             |                                                           |
| Bp Bp1651                 |                                                               |                                                               | x                                                           |                                                           |
| Bp K42                    |                                                               |                                                               | x                                                           |                                                           |
| Bp MSHR146*               |                                                               |                                                               | x                                                           |                                                           |
| Bp MSHR 346               |                                                               |                                                               | x                                                           |                                                           |
| Bp MSHR 511               |                                                               |                                                               | x                                                           |                                                           |
| Bp PB08298010             |                                                               |                                                               | x                                                           |                                                           |
| Bp NAU20B-16              |                                                               |                                                               | x                                                           |                                                           |
| Bp TSV48                  |                                                               |                                                               | x                                                           |                                                           |
| <i>Mismatch profile 4</i> |                                                               |                                                               |                                                             |                                                           |
| Bp MSHR 391               |                                                               |                                                               | x                                                           | x                                                         |
| Bp MSHR 491               |                                                               |                                                               | x                                                           | x                                                         |
| Bp MSHR 668               |                                                               |                                                               | x                                                           | x                                                         |

FoD, Fraction of duplex; Bp, *B. pseudomallei*; Bt, *B. thailandensis*; \*, indicates sample was previously tested by the *Bcom* assay
