# Supplementary material for: A Quadruplex Real-Time PCR Assay for the Rapid Detection and Differentiation of the Most Relevant Members of the B. pseudomallei Complex: B. mallei, B. pseudomallei, and B. thailandensis
Source: PubMed Central journal article supplement (PMC5063335; doi:10.1371/journal.pone.0164006), 2016-10-13
Supplement: pone.0164006.s008.pdf [file pone.0164006.s008.pdf]

| <b>Isolate</b>            | <b><i>fliC</i> Probe G-T<br/>Mismatch 1<br/>FoD: 0.997</b> | <b><i>fliC</i> Probe C-C<br/>Mismatch 2<br/>FoD: 0.985</b> | <b><i>fliC</i> Forward C-C<br/>Mismatch<br/>FoD: 0.940</b> |
|---------------------------|------------------------------------------------------------|------------------------------------------------------------|------------------------------------------------------------|
| <i>Mismatch profile 1</i> |                                                            |                                                            |                                                            |
| Bp TSV202                 | x                                                          |                                                            |                                                            |
| Bp MSHR 1655              | x                                                          |                                                            |                                                            |
| <i>Mismatch profile 2</i> |                                                            |                                                            |                                                            |
| Bt 34                     |                                                            | x                                                          |                                                            |
| Bt 2003015869             |                                                            | x                                                          |                                                            |
| Bt H0587                  |                                                            | x                                                          |                                                            |
| <i>Mismatch profile 3</i> |                                                            |                                                            |                                                            |
| Bo C6786                  |                                                            | x                                                          | x                                                          |
| Bo EO147                  |                                                            | x                                                          | x                                                          |

FoD, Fraction of duplex; Bp, *B. pseudomallei*; Bt, *B. thailandensis*; Bo, *B. oklahomensis*
